# Supplementary material
Source: PubMed Central journal article supplement (PMC9664185)
Supplement: djac157_supplementary_data.pdf [file djac157_supplementary_data.pdf]

## SUPPLEMENTARY MATERIAL

# Clinicopathological features and outcomes comparing patients with invasive ductal and lobular breast cancer

Oesterreich S, et al.

### Contents:

1. **Supplementary Methods**
2. **Supplementary Table 1:** Comparison of GLBC cohort to other large, published cohorts of patients with IDC and ILC.
3. **Supplementary Table 2:** Comparison of our cohort to National Program of Cancer Registries (NPCR) and Surveillance, Epidemiology, and End Results (SEER) databases.
4. **Supplementary Table 3:** Patient characteristics broken down by institution.
5. **Supplementary Table 4:** Comparison of BMI between patients with IDC and ILC in various GLBC cohorts.
6. **Supplementary Table 5:** Patient characteristics of those who had ER+/HER2- tumors.
7. **Supplementary Table 6:** Standardized mean differences after propensity score matching to show that cohorts were well-matched.
8. **Supplementary Table 7:** Performance of OncotypeDX Recurrence Score using different cutoffs.
9. **Supplementary Table 8:** Time to recurrence for different metastatic sites.
10. **Supplementary Figure 1:** Summary of missingness of data by record year.
11. **Supplementary Figure 2:** DFS & OS of (A) patients with IDC stratified by disease subtype, (B) patients with ILC stratified by disease subtype, (C) patients with HER2+ IDC and ILC, and (D) patients with TN IDC and ILC.
12. **Supplementary Figure 3:** DFS & OS of patients classified by OncotypeDX scores stratified by nodal status.
13. **Supplementary Figure 4:** Distant recurrence sites for the entire cohort of patients with ILC and IDC.
14. **Supplementary Figure 5:** Trends in tumor size and treatment types for the entire cohort of patients with ILC and IDC.
15. **Supplementary Figure 6:** Figure summarizing the key findings of the study.

## **SUPPLEMENTARY METHODS**

### *Data Sources*

This retrospective cohort study included female adults (aged > 18 years) who were diagnosed with breast cancer from 1990 to 2017 treated at any of the three academic medical centers: UPMC (Magee Women's Hospital and Hillman Cancer Center), Cleveland Clinic, and Ohio State University Comprehensive Cancer Center. Institutional review boards at each institution approved this study and waived informed consent because all of the data used were deidentified. We followed the Strengthening the Reporting of Observational Studies in Epidemiology (STROBE) reporting guideline.

Clinical data included in the study were obtained from each institution's Cancer Registry; these data were retrospectively abstracted manually according to the data standards of the North American Association of Central Cancer Registries.

In order to test whether the Great Lakes Breast Cancer (GLBC) cohort was representative of the larger IDC/ILC populations, we extracted demographics data from National Program of Cancer Registries (NPCR) within the Surveillance, Epidemiology and End Results (SEER) data set <sup>30</sup>.

Oncotype Dx Breast Recurrence Score<sup>®</sup> result (hereafter denoted as Recurrence Score<sup>®</sup> [RS]) data were received from Exact Sciences (Redwood City, CA) for a subset of patients and matched into the data based on the deidentified patient ID.

### *Study Population, Outcomes, and Variable Definitions*

In the raw datasets, there were 44,278 records from 42,740 patients in total (UPMC: 17,933 records from 16,932 patients; CCF: 16,336 records from 15,811 patients; OSUCCC: 10,009 records from 9,997 patients). Due to the goal of this study, we filtered the dataset according to the following criteria: 1) excluding 518 records (483 patients) with size Tis or Stage 0; 2) excluding 5,645 records (5,295 patients) with ICD histology codes not consistent with either IDC or ILC; 3) excluding 4,453 records (3,300 patients) with multiple records (**Figure 1**).

Briefly, diagnosis of ILC is similar at all three institutions, in that sections from diagnostic biopsies were analyzed histopathologically using information on growth pattern and cytologic features. Briefly, ILC is diagnosed based on identification of small cells that lack cohesion and are individually dispersed throughout the tissue, arranged in single-file linear cords. The use of E-cadherin staining differs between the sites, with CCF using it for more challenging cases, including lobular variants, and UPMC and OSUCCC using not only E-cadherin but frequently dual E-cadherin and p120 staining in the majority of ILC cases. This however is not consistent since the cohort spans almost 30 years and approaches changed over the time.

Two outcomes, overall survival (OS) and disease-free survival (DFS), are used in this study. If not directly provided, overall survival was defined as the difference between the date of death and date of first diagnosis. If the date of death was not available, it was replaced by the date of last contact with survival status being censored. DFS is defined as the difference between the date of first breast cancer recurrence and date of diagnosis and it a summation of the locoregional and distant recurrences. If the date of first recurrence was not available, it was replaced by the date of death or date of last

contact with DFS status being censored. DFS does not include second primary cancers or new contralateral breast cancers. More details can be found in the Data Manual, which is available upon request.

Five deidentified patient unique variables (record ID, patient ID, duplicated indicator, record time, and hospital), four demographic related variables (age, race, BMI, menopausal status), ten basic clinical variables (laterality, stage (using AJCC 6<sup>th</sup> and 7<sup>th</sup> edition), grade, size, ER, progesterone receptor (PR), HER2, RS, Oncotype Dx<sup>®</sup> and TAILORx RS category (low/intermediate or high risk stratified at a RS of 25), and histology), and four treatment variables (radiation therapy, hormonal therapy, chemotherapy, and surgery). Some data were missing, mostly due to lack of collection of specific variables in earlier years as summarized in **Supplementary Figure 1**. There was no significant association between the missing data and histology. Briefly, we evaluated the missing pattern of each variable in the ER+ group separately by fitting the logistic regression of missing patterns against histological type and the variable of interest. After adjusting for the other clinical variables (Age, BMI, PR, HER2, Stage, Grade, OS, DFS), the results show that there is no significant relationship between missing patterns and the histological subtype (**Supplementary Figure 1B**) and thus can be considered at random.

Information on 16 metastasis site indicators (bone, liver, lung, central nervous system, orbit, distant lymph node, peritoneal carcinomatosis, gastrointestinal tract, pericardium or pericardial fluid, skin, genitourinary tract, gynecological sites, connective soft tissue, bone marrow, thyroid, and chest wall) were extracted from the raw dataset obtained from the cancer registry of individual institutions. Manual chart review was performed

when needed to clarify recurrence sites that were designated as “other”. The details of variable definition are included in the Data Manual.

### *Statistical Analysis*

All continuous data are expressed as median (IQR), and categorical/ordinal variables are expressed as count (frequencies (%)). Mann–Whitney U test was used for the continuous variables (age and BMI), Pearson's chi-squared test with no continuity correction was used for categorical variables (laterality, race, ER, PR, HER2, and treatments), and Cochran-Armitage test was used for ordinal variables (stage, grade, lymph node status, size, and RS result) in the comparative analyses.

Kaplan-Meier curves are used for visualizing survival, and the corresponding p-values are calculated by log-rank test to test for difference between the groups. Cox proportional hazard regression models are fitted when co-variables adjustment was needed, and the estimated hazard ratios (HR) are reported with the 95% confidence interval. We use the R package *survival*<sup>31</sup> to perform the analysis.

To determine whether treatments (lumpectomy, mastectomy, radiation therapy, chemotherapy, and hormone therapy) were more beneficial for either IDC or ILC, we selected comparable cohorts using propensity score matching (PSM) approaches. We used nearest neighbor matching strategy in R package *MatchIt*<sup>32</sup> to match over age, stage, grade, nodal status, and institution, and the treatment information was adjusted in the subsequent survival analysis. For example, for those who received adjuvant hormone therapy, the matching procedure was as follows: starting from all patients with

ER+ tumors who received hormone therapy, patients with IDC and ILC were matched over age, stage, grade, institution, and lymph nodal status. After propensity score matching, using Cox proportional hazards regression modeling, we then test whether the histology was associated with survival in the matched cohort after adjusting for the other treatments (surgery, radiation therapy, and chemotherapy). All samples with missing data were excluded from inclusion in the propensity score matching. Results are presented as standardized mean differences (SMD) before and after PSM. All PSM analysis was performed for all patients with ER+ IDC and ER+ ILC.

To study changes over time, we calculated the mean tumor size, the proportion of different surgery types and the use of hormonal therapy, chemotherapy and radiation both IDC and ILC for each year over the study period (1990-2017). Loess regressions (`stat::loess()` function in R) with 95% confidence interval were fitted to show trends of tumors size and treatments over time.

A p-value  $< 0.05$  is considered statistically significant, and 95% confidence intervals are reported. When adequate, we corrected for multiple comparisons using conservative Bonferroni correction, and present both raw p-values and corrected p-values. Since we have large sample size, effect size is also considered in the interpretation in addition to p-values. All the statistical analyses are conducted in R 4.0.

**Supplementary Table 1: Comparison of our GLBC cohort to other published datasets.**

| Characteristic   | GLBC, N =<br>33,662 | Metabric, N =<br>1,642 | ScanB, N =<br>2,988 | TCGA, N =<br>1,117 | Arpino_ILC, N =<br>49,309 | Chen_SEER, N =<br>796,335 |
|------------------|---------------------|------------------------|---------------------|--------------------|---------------------------|---------------------------|
| <b>Histology</b> |                     |                        |                     |                    |                           |                           |
| IDC              | 30,045<br>(89.3%)   | 1,500 (91.4%)          | 2,602<br>(87.1%)    | 901 (80.7%)        | 45,169 (91.6%)            | 711,287 (89.3%)           |
| ILC              | 3,617<br>(10.7%)    | 142 (8.6%)             | 386 (12.9%)         | 216 (19.3%)        | 4,140 (8.4%)              | 85,048 (10.7%)            |
| <b>Age</b>       |                     |                        |                     |                    |                           |                           |
| <= 50            | 10,525<br>(31.3%)   | 372 (22.7%)            | 636 (21.3%)         | 351 (31.4%)        | 11,364 (26.8%)            |                           |
| > 50             | 23,136<br>(68.7%)   | 1,270 (77.3%)          | 2,352<br>(78.7%)    | 766 (68.6%)        | 31,088 (73.2%)            |                           |
| Unknown          | 1                   | 0                      | 0                   | 0                  | 6,857                     |                           |
| <b>Stage</b>     |                     |                        |                     |                    |                           |                           |
| 1 ~ 2            | 24,406<br>(88.5%)   | 1,081 (90.8%)          | 2,501<br>(96.9%)    | 832 (75.8%)        |                           | 660,664 (83.0%)           |
| 3 ~ 4            | 3,175<br>(11.5%)    | 110 (9.2%)             | 79 (3.1%)           | 266 (24.2%)        |                           | 135,671 (17.0%)           |
| Unknown          | 6,081               | 451                    | 408                 | 19                 |                           | 0                         |
| <b>Grade</b>     |                     |                        |                     |                    |                           |                           |
| 1                | 4,679<br>(16.9%)    | 122 (7.7%)             |                     |                    |                           | 153,608 (19.6%)           |
| 2                | 12,640<br>(45.5%)   | 610 (38.5%)            |                     |                    |                           | 344,373 (43.9%)           |
| 3                | 10,441<br>(37.6%)   | 852 (53.8%)            |                     |                    |                           | 286,920 (36.6%)           |
| Unknown          | 5,902               | 58                     |                     |                    |                           | 11,434                    |
| <b>ER</b>        |                     |                        |                     |                    |                           |                           |
| Positive         | 19,788<br>(78.7%)   | 1,220 (74.3%)          | 2,605<br>(92.4%)    | 543 (76.8%)        | 40,515 (82.2%)            | 625,471 (78.8%)           |
| Negative         | 5,370<br>(21.3%)    | 422 (25.7%)            | 215 (7.6%)          | 164 (23.2%)        | 8,794 (17.8%)             | 168,560 (21.2%)           |
| Unknown          | 8,504               | 0                      | 168                 | 410                | 0                         | 2,304                     |
| <b>PR</b>        |                     |                        |                     |                    |                           |                           |
| Positive         | 17,074<br>(68.2%)   | 829 (50.5%)            | 2,346<br>(86.9%)    | 473 (67.2%)        | 29,419 (60.8%)            | 533,738 (67.5%)           |
| Negative         | 7,945<br>(31.8%)    | 813 (49.5%)            | 354 (13.1%)         | 231 (32.8%)        | 18,962 (39.2%)            | 257,023 (32.5%)           |
| Unknown          | 8,643               | 0                      | 288                 | 413                | 927                       | 5,574                     |

**Supplementary Table 2:** Comparison of our cohort to National Program of Cancer Registries (NPCR) and Surveillance, Epidemiology, and End Results (SEER) databases.

|                                    | <b>NPCR US (2001-2017)</b> | <b>NPCR PA (2001-2017)</b> | <b>NPCR OH (2001-2017)</b> | <b>SEER-9 (1990-2017)</b> |
|------------------------------------|----------------------------|----------------------------|----------------------------|---------------------------|
| <b>Total N</b>                     | 2,872,831                  | 138,766                    | 122,025                    | 437,381                   |
| <b>Histology (Chen et al 2005)</b> |                            |                            |                            |                           |
| ILC (ICDO-3=8520)                  | 319,750 (11.1%)            | 16,023 (11.5%)             | 13,227 (10.8%)             | 48,428 (11.1%)            |
| IDC (ICDO-3=8500)                  | 2,553,081 (88.9%)          | 122,743 (88.5%)            | 108,798 (89.2%)            | 388,953 (88.9%)           |
| <b>Age</b>                         |                            |                            |                            |                           |
| 20-49                              | 598,685 (20.8%)            | 26,321 (19.0%)             | 23,374 (19.2%)             | 97,613 (22.3%)            |
| 50+                                | 2,274,146 (79.2%)          | 112,445 (81.0%)            | 98,651 (80.8%)             | 339,768 (77.7%)           |
| <b>Stage</b>                       |                            |                            |                            |                           |
| Localized                          | 1,817,911 (64.5%)          | 88,759 (64.8%)             | 77,230 (64.4%)             | 216,752 (65.5%)           |
| Regional                           | 861,438 (30.6%)            | 39,998 (29.2%)             | 36,475 (30.4%)             | 98,883 (29.9%)            |
| Distant                            | 140,213 (5.0%)             | 8,169 (6.0%)               | 6,305 (5.3%)               | 15,167 (4.6%)             |
| unknown                            | 53,269                     | 1,840                      | 2,015                      | 106,579                   |
| <b>Grade</b>                       |                            |                            |                            |                           |
| 1                                  | 543,361 (20.4%)            | 24,847 (19.3%)             | 24,370 (22.0%)             | 80,041 (20.5%)            |
| 2                                  | 1,173,129 (44.1%)          | 59,293 (46.0%)             | 48,068 (43.4%)             | 170,700 (43.8%)           |
| 3                                  | 943,407 (35.5%)            | 44,741 (34.7%)             | 38,367 (34.6%)             | 138,938 (35.7%)           |
| unknown                            | 212,934                    | 9,885                      | 11,220                     | 47,702                    |
| <b>ER Status (2004+)</b>           |                            |                            |                            |                           |
| Positive                           | 1,828,653 (80.6%)          | 94,135 (82.0%)             | 80,306 (80.3%)             | 319,801 (80.0%)           |
| Negative                           | 440,142 (19.4%)            | 20,668 (18.0%)             | 19,733 (19.7%)             | 80,020 (20.0%)            |
| unknown                            | 604,036                    | 23,963                     | 21,986                     | 37,560                    |
| <b>PR Status (2004+)</b>           |                            |                            |                            |                           |
| Positive                           | 1,567,929 (70.0%)          | 82,012 (71.9%)             | 69,381 (69.6%)             | 273,847 (69.3%)           |
| Negative                           | 672,267 (30.0%)            | 32,058 (28.1%)             | 30,359 (30.4%)             | 121,571 (30.7%)           |
| unknown                            | 632,635                    | 24,696                     | 22,285                     | 41,963                    |
| <b>Race</b>                        |                            |                            |                            |                           |
| White                              | 2,420,064 (84.6%)          | 124,099 (89.8%)            | 107,376 (88.3%)            | 355,302 (81.5%)           |
| Black                              | 323,288 (11.3%)            | 11,873 (8.6%)              | 12,498 (10.3%)             | 41,493 (9.5%)             |
| Other                              | 117,819 (4.1%)             | 2,240 (1.6%)               | 1,668 (1.4%)               | 39,174 (9.0%)             |
| unknown                            | 11,660                     | 554                        | 483                        | 1,412                     |



**Supplementary Table 3:** Patient characteristics broken down by institution.

| Characteristic    | UPMC, N = 14,033 <sup>a</sup> | CCF, N = 12,194 <sup>a</sup> | OSU, N = 7,435 <sup>a</sup> | p-value <sup>b</sup> |
|-------------------|-------------------------------|------------------------------|-----------------------------|----------------------|
| <b>Histology</b>  |                               |                              |                             | <0.001               |
| IDC               | 12,691 (90%)                  | 10,687 (88%)                 | 6,667 (90%)                 |                      |
| ILC               | 1,342 (9.6%)                  | 1,507 (12%)                  | 768 (10%)                   |                      |
| <b>Age (Year)</b> | 57 (48, 67)                   | 58 (48, 68)                  | 57 (48, 66)                 | <0.001               |
| Unknown           | 0                             | 1                            | 0                           |                      |
| <b>BMI</b>        | 27 (23, 31)                   | 27 (24, 32)                  | 29 (25, 33)                 | <0.001               |
| Unknown           | 1,391                         | 6,471                        | 1,999                       |                      |
| <b>Laterality</b> |                               |                              |                             | 0.50                 |
| Left              | 7,118 (51%)                   | 0 (NA%)                      | 3,806 (51%)                 |                      |
| Right             | 6,889 (49%)                   | 0 (NA%)                      | 3,610 (49%)                 |                      |
| Unknown           | 26                            | 12,194                       | 19                          |                      |
| <b>Race</b>       |                               |                              |                             | <0.001               |
| Black             | 780 (5.6%)                    | 1,581 (13%)                  | 661 (8.9%)                  |                      |
| White             | 13,067 (93%)                  | 10,290 (85%)                 | 6,551 (89%)                 |                      |
| Other             | 186 (1.3%)                    | 243 (2.0%)                   | 223 (3.0%)                  |                      |
| Unknown           | 0                             | 80                           | 0                           |                      |
| <b>Stage</b>      |                               |                              |                             | <0.001               |
| I                 | 6,696 (56%)                   | 4,990 (54%)                  | 3,097 (49%)                 |                      |
| II                | 4,155 (35%)                   | 3,041 (33%)                  | 2,427 (38%)                 |                      |
| III               | 1,010 (8.4%)                  | 839 (9.1%)                   | 621 (9.8%)                  |                      |
| IV                | 171 (1.4%)                    | 365 (4.0%)                   | 169 (2.7%)                  |                      |
| Unknown           | 2,001                         | 2,959                        | 1,121                       |                      |
| <b>Grade</b>      |                               |                              |                             | <0.001               |
| 1                 | 2,025 (16%)                   | 1,525 (18%)                  | 1,129 (16%)                 |                      |
| 2                 | 6,012 (48%)                   | 3,436 (41%)                  | 3,192 (46%)                 |                      |
| 3                 | 4,391 (35%)                   | 3,487 (41%)                  | 2,563 (37%)                 |                      |
| Unknown           | 1,605                         | 3,746                        | 551                         |                      |

| Characteristic     | UPMC, N = 14,033 <sup>a</sup> | CCF, N = 12,194 <sup>a</sup> | OSU, N = 7,435 <sup>a</sup> | p-value <sup>b</sup> |
|--------------------|-------------------------------|------------------------------|-----------------------------|----------------------|
| <b>ER</b>          |                               |                              |                             | <0.001               |
| Positive           | 10,834 (80%)                  | 5,505 (77%)                  | 3,449 (77%)                 |                      |
| Negative           | 2,712 (20%)                   | 1,612 (23%)                  | 1,046 (23%)                 |                      |
| Unknown            | 487                           | 5,077                        | 2,940                       |                      |
| <b>PR</b>          |                               |                              |                             | <0.001               |
| Positive           | 9,610 (71%)                   | 4,536 (64%)                  | 2,928 (65%)                 |                      |
| Negative           | 3,842 (29%)                   | 2,541 (36%)                  | 1,562 (35%)                 |                      |
| Unknown            | 581                           | 5,117                        | 2,945                       |                      |
| <b>HER2</b>        |                               |                              |                             | <0.001               |
| Positive           | 816 (15%)                     | 915 (19%)                    | 582 (17%)                   |                      |
| Negative           | 4,473 (82%)                   | 3,811 (81%)                  | 2,735 (81%)                 |                      |
| Equivocal          | 199 (3.6%)                    | 1 (<0.1%)                    | 69 (2.0%)                   |                      |
| Unknown            | 8,545                         | 7,467                        | 4,049                       |                      |
| <b>Lymph Nodes</b> |                               |                              |                             | <0.001               |
| N0                 | 8,786 (64%)                   | 6,197 (62%)                  | 4,283 (60%)                 |                      |
| N1                 | 3,143 (23%)                   | 2,256 (22%)                  | 1,822 (26%)                 |                      |
| N2                 | 562 (4.1%)                    | 402 (4.0%)                   | 321 (4.5%)                  |                      |
| N3                 | 240 (1.7%)                    | 153 (1.5%)                   | 174 (2.4%)                  |                      |
| NX                 | 1,081 (7.8%)                  | 1,068 (11%)                  | 539 (7.6%)                  |                      |
| Unknown            | 221                           | 2,118                        | 296                         |                      |
| <b>Size</b>        |                               |                              |                             | <0.001               |
| T0                 | 460 (3.3%)                    | 214 (2.4%)                   | 266 (3.7%)                  |                      |
| T1                 | 9,074 (65%)                   | 5,485 (61%)                  | 4,073 (57%)                 |                      |
| T2                 | 3,163 (23%)                   | 2,126 (23%)                  | 1,940 (27%)                 |                      |
| T3                 | 514 (3.7%)                    | 276 (3.0%)                   | 293 (4.1%)                  |                      |
| T4                 | 155 (1.1%)                    | 105 (1.2%)                   | 89 (1.2%)                   |                      |
| TX                 | 531 (3.8%)                    | 848 (9.4%)                   | 482 (6.7%)                  |                      |
| Unknown            | 136                           | 3,140                        | 292                         |                      |

| Characteristic                             | UPMC, N =<br>14,033 <sup>a</sup> | CCF, N = 12,194 <sup>a</sup> | OSU, N = 7,435 <sup>a</sup> | p-value <sup>b</sup> |
|--------------------------------------------|----------------------------------|------------------------------|-----------------------------|----------------------|
| <b>OncotypeDX<br/>Recurrence<br/>Score</b> |                                  |                              |                             | 0.57                 |
| Low Risk                                   | 1,318 (59%)                      | 715 (58%)                    | 400 (58%)                   |                      |
| Intermediate Risk                          | 699 (32%)                        | 393 (32%)                    | 217 (32%)                   |                      |
| High Risk                                  | 202 (9.1%)                       | 126 (10%)                    | 68 (9.9%)                   |                      |
| Unknown                                    | 11,814                           | 10,960                       | 6,750                       |                      |
| <b>Hormone<br/>Therapy</b>                 |                                  |                              |                             | <0.001               |
| No                                         | 3,773 (28%)                      | 5,938 (49%)                  | 2,647 (36%)                 |                      |
| Yes                                        | 9,784 (72%)                      | 6,245 (51%)                  | 4,788 (64%)                 |                      |
| Unknown                                    | 476                              | 11                           | 0                           |                      |
| <b>Chemotherapy</b>                        |                                  |                              |                             | <0.001               |
| No                                         | 7,242 (53%)                      | 6,167 (57%)                  | 3,537 (48%)                 |                      |
| Yes                                        | 6,537 (47%)                      | 4,597 (43%)                  | 3,898 (52%)                 |                      |
| Unknown                                    | 254                              | 1,430                        | 0                           |                      |
| <b>Surgery</b>                             |                                  |                              |                             | <0.001               |
| Lumpectomy                                 | 7,664 (55%)                      | 2,076 (17%)                  | 3,582 (52%)                 |                      |
| Mastectomy                                 | 5,832 (42%)                      | 7,861 (65%)                  | 3,322 (48%)                 |                      |
| None                                       | 513 (3.7%)                       | 2,158 (18%)                  | 42 (0.6%)                   |                      |
| Unknown                                    | 24                               | 99                           | 489                         |                      |

a Median (IQR); n (%)

b Kruskal-Wallis rank sum test; Pearson's Chi-squared test (all tests were 2-sided).

**Supplementary Table 4:** Comparison of BMI across cohorts within the GLBC data.

| <b>Cohort</b>             | <b>IDC; median (SD)</b> | <b>ILC; median (SD)</b> | <b>P-value</b> |
|---------------------------|-------------------------|-------------------------|----------------|
| Entire Cohort             | 27 (6)                  | 27 (6)                  | 0.15           |
| ER+ Only                  | 27 (6)                  | 27 (6)                  | 0.27           |
| ER+/HER2-                 | 28 (6)                  | 27 (6)                  | 0.09           |
| ER+ Pre-menopausal women  | 26 (6)                  | 25 (6)                  | 0.32           |
| ER+ Post-menopausal women | 28 (6)                  | 28 (6)                  | 0.88           |

**Supplementary Table 5: Patient characteristics for those who had ER+/HER2- tumors.**

| Characteristic    | Entire Cohort               |                              |                      |                      | Cohort with ER+/HER2-       |                             |                      |                      |
|-------------------|-----------------------------|------------------------------|----------------------|----------------------|-----------------------------|-----------------------------|----------------------|----------------------|
|                   | ILC, N = 3,617 <sup>a</sup> | IDC, N = 30,045 <sup>a</sup> | p-value <sup>b</sup> | q-value <sup>c</sup> | ILC, N = 1,558 <sup>a</sup> | IDC, N = 7,650 <sup>a</sup> | p-value <sup>b</sup> | q-value <sup>c</sup> |
| Age (Year)        | 61 (52, 70)                 | 57 (48, 67)                  | <0.001               | <0.001               | 62 (53, 70)                 | 60 (51, 69)                 | <0.001               | <0.001               |
| Unknown           | 0                           | 1                            |                      |                      |                             |                             |                      |                      |
| BMI               | 27 (24, 32)                 | 27 (24, 32)                  | 0.15                 | >0.9                 | 27 (24, 33)                 | 28 (24, 33)                 | 0.095                | >0.9                 |
| Unknown           | 1,102                       | 8,759                        |                      |                      | 209                         | 973                         |                      |                      |
| Laterality        |                             |                              | 0.6                  | >0.9                 |                             |                             | 0.4                  | >0.9                 |
| Left              | 1,083 (52%)                 | 9,841 (51%)                  |                      |                      | 500 (52%)                   | 2,590 (51%)                 |                      |                      |
| Right             | 1,017 (48%)                 | 9,482 (49%)                  |                      |                      | 455 (48%)                   | 2,514 (49%)                 |                      |                      |
| Unknown           | 1,517                       | 10,722                       |                      |                      | 603                         | 2,546                       |                      |                      |
| Race              |                             |                              | 0.004                | 0.046                |                             |                             | 0.4                  | >0.9                 |
| Black             | 276 (7.6%)                  | 2,746 (9.2%)                 |                      |                      | 137 (8.8%)                  | 615 (8.1%)                  |                      |                      |
| White             | 3,275 (91%)                 | 26,633 (89%)                 |                      |                      | 1,388 (89%)                 | 6,849 (90%)                 |                      |                      |
| Other             | 60 (1.7%)                   | 592 (2.0%)                   |                      |                      | 29 (1.9%)                   | 175 (2.3%)                  |                      |                      |
| Unknown           | 6                           | 74                           |                      |                      | 4                           | 11                          |                      |                      |
| Stage             |                             |                              | <0.001               | <0.001               |                             |                             | <0.001               | <0.001               |
| I                 | 1,406 (46%)                 | 13,377 (54%)                 |                      |                      | 619 (45%)                   | 4,298 (62%)                 |                      |                      |
| II                | 1,008 (33%)                 | 8,615 (35%)                  |                      |                      | 476 (34%)                   | 1,994 (29%)                 |                      |                      |
| III               | 502 (17%)                   | 1,968 (8.0%)                 |                      |                      | 246 (18%)                   | 535 (7.7%)                  |                      |                      |
| IV                | 112 (3.7%)                  | 593 (2.4%)                   |                      |                      | 42 (3.0%)                   | 114 (1.6%)                  |                      |                      |
| Unknown           | 589                         | 5,492                        |                      |                      | 175                         | 709                         |                      |                      |
| Grade             |                             |                              | <0.001               | <0.001               |                             |                             | <0.001               | <0.001               |
| 1                 | 631 (24%)                   | 4,048 (16%)                  |                      |                      | 377 (26%)                   | 1,792 (25%)                 |                      |                      |
| 2                 | 1,656 (64%)                 | 10,984 (44%)                 |                      |                      | 946 (66%)                   | 3,750 (52%)                 |                      |                      |
| 3                 | 294 (11%)                   | 10,147 (40%)                 |                      |                      | 111 (7.7%)                  | 1,658 (23%)                 |                      |                      |
| Unknown           | 1,036                       | 4,866                        |                      |                      | 124                         | 450                         |                      |                      |
| ER                |                             |                              | <0.001               | <0.001               |                             |                             |                      |                      |
| Positive          | 2,564 (96%)                 | 17,224 (77%)                 |                      |                      |                             |                             |                      |                      |
| Negative          | 104 (3.9%)                  | 5,266 (23%)                  |                      |                      |                             |                             |                      |                      |
| Unknown           | 949                         | 7,555                        |                      |                      |                             |                             |                      |                      |
| PR                |                             |                              | <0.001               | <0.001               |                             |                             | <0.001               | 0.002                |
| Positive          | 2,144 (81%)                 | 14,930 (67%)                 |                      |                      | 1,306 (84%)                 | 6,693 (88%)                 |                      |                      |
| Negative          | 508 (19%)                   | 7,437 (33%)                  |                      |                      | 247 (16%)                   | 947 (12%)                   |                      |                      |
| Unknown           | 965                         | 7,678                        |                      |                      | 5                           | 10                          |                      |                      |
| HER2              |                             |                              | <0.001               | <0.001               |                             |                             |                      |                      |
| Positive          | 169 (9.4%)                  | 2,144 (18%)                  |                      |                      |                             |                             |                      |                      |
| Negative          | 1,607 (90%)                 | 9,412 (80%)                  |                      |                      |                             |                             |                      |                      |
| Equivocal         | 19 (1.1%)                   | 250 (2.1%)                   |                      |                      |                             |                             |                      |                      |
| Unknown           | 1,822                       | 18,239                       |                      |                      |                             |                             |                      |                      |
| LymphNodes        |                             |                              | <0.001               | <0.001               |                             |                             | <0.001               | <0.001               |
| N0                | 1,892 (57%)                 | 17,374 (63%)                 |                      |                      | 870 (59%)                   | 4,985 (68%)                 |                      |                      |
| N1                | 805 (24%)                   | 6,416 (23%)                  |                      |                      | 319 (22%)                   | 1,447 (20%)                 |                      |                      |
| N2                | 173 (5.3%)                  | 1,112 (4.0%)                 |                      |                      | 100 (6.7%)                  | 358 (4.9%)                  |                      |                      |
| N3                | 150 (4.6%)                  | 417 (1.5%)                   |                      |                      | 88 (5.9%)                   | 133 (1.8%)                  |                      |                      |
| NX                | 273 (8.3%)                  | 2,415 (8.7%)                 |                      |                      | 106 (7.1%)                  | 365 (5.0%)                  |                      |                      |
| Unknown           | 324                         | 2,311                        |                      |                      | 75                          | 362                         |                      |                      |
| Size              |                             |                              | <0.001               | <0.001               |                             |                             | <0.001               | <0.001               |
| T0                | 13 (0.6%)                   | 927 (3.3%)                   |                      |                      | 1 (<0.1%)                   | 99 (1.3%)                   |                      |                      |
| T1                | 1,107 (49%)                 | 17,525 (63%)                 |                      |                      | 506 (49%)                   | 5,175 (70%)                 |                      |                      |
| T2                | 695 (31%)                   | 6,534 (23%)                  |                      |                      | 327 (32%)                   | 1,647 (22%)                 |                      |                      |
| T3                | 307 (14%)                   | 776 (2.8%)                   |                      |                      | 172 (17%)                   | 172 (2.3%)                  |                      |                      |
| T4                | 15 (0.7%)                   | 334 (1.2%)                   |                      |                      | 3 (0.3%)                    | 54 (0.7%)                   |                      |                      |
| TX                | 100 (4.5%)                  | 1,761 (6.3%)                 |                      |                      | 28 (2.7%)                   | 225 (3.1%)                  |                      |                      |
| Unknown           | 1,380                       | 2,188                        |                      |                      | 521                         | 278                         |                      |                      |
| Oncotype          |                             |                              | <0.001               | <0.001               |                             |                             | <0.001               | 0.003                |
| Low Risk          | 407 (65%)                   | 2,026 (58%)                  |                      |                      | 328 (66%)                   | 1,684 (60%)                 |                      |                      |
| Intermediate Risk | 204 (33%)                   | 1,105 (31%)                  |                      |                      | 160 (32%)                   | 858 (31%)                   |                      |                      |
| High Risk         | 12 (1.9%)                   | 383 (11%)                    |                      |                      | 7 (1.4%)                    | 261 (9.3%)                  |                      |                      |
| Unknown           | 2,994                       | 26,531                       |                      |                      | 1,063                       | 4,847                       |                      |                      |

<sup>a</sup>Median (IQR); n (%)

<sup>b</sup>Wilcoxon rank sum test; Pearson's Chi-squared test; Kruskal-Wallis rank sum test

<sup>c</sup>Bonferroni correction for multiple testing

<sup>d</sup>Other includes Hispanic, Asian, and American Indian.

**Supplementary Table 6:** Standardized mean differences (SMD) after propensity score matching to show that cohorts were well-matched.

|                                                 | SMD before PSM | SMD after PSM |
|-------------------------------------------------|----------------|---------------|
| Patients under lumpectomy matching group        |                |               |
| Age                                             | 0.308          | 0.008         |
| Stage                                           | 0.213          | 0.067         |
| Grade                                           | 0.487          | 0.107         |
| Site                                            | 0.508          | 0.036         |
| Lymph Node Status                               | 0.190          | 0.050         |
| Patients under mastectomy matching group        |                |               |
| Age                                             | 0.180          | 0.021         |
| Stage                                           | 0.616          | 0.110         |
| Grade                                           | 0.524          | 0.049         |
| Site                                            | 0.777          | 0.070         |
| Lymph Node Status                               | 0.375          | 0.097         |
| Patients under radiation therapy matching group |                |               |
| Age                                             | 0.170          | 0.001         |
| Stage                                           | 0.476          | 0.072         |
| Grade                                           | 0.509          | 0.093         |
| Site                                            | 0.493          | 0.043         |
| Lymph Node Status                               | 0.366          | 0.052         |
| Patients under chemotherapy matching group      |                |               |
| Age                                             | 0.380          | 0.012         |
| Stage                                           | 0.546          | 0.057         |
| Grade                                           | 0.700          | 0.088         |
| Site                                            | 0.283          | 0.091         |
| Lymph Node Status                               | 0.456          | 0.115         |
| Patients under hormone therapy matching group   |                |               |
| Age                                             | 0.207          | 0.020         |
| Stage                                           | 0.442          | 0.045         |
| Grade                                           | 0.487          | 0.070         |
| Site                                            | 0.551          | 0.044         |
| Lymph Node Status                               | 0.305          | 0.054         |

**Supplementary Table 7: Use of different cutoffs for OncotypeDX Recurrence Score.**

|                                             | <b>Continuous</b> | <b>TAILORX</b>  | <b>Oncotype DX</b>               |
|---------------------------------------------|-------------------|-----------------|----------------------------------|
| <b>Overall Survival [HR (p-value)]</b>      |                   |                 |                                  |
| Overall                                     | 1.02 (0.0236)     | 2.08 (0.000345) | 1.39 (0.09); 2.14 (0.00197)      |
| IDC                                         | 1.02 (0.0078)     | 2.36 (9.83e-05) | 1.56 (0.03958); 2.52 (0.00034)   |
| ILC                                         | 0.99 (0.804)      | 1.13 (0.866)    | 0.89 (0.797); 0 (0.997)          |
| # Records                                   | 3096              | 3712            | 4066                             |
| <b>Disease-Free Survival [HR (p-value)]</b> |                   |                 |                                  |
| Overall                                     | 1.03 (3.83e-05)   | 2.78 (1.83e-06) | 2.23 (0.000239); 3.60 (1.32e-06) |
| IDC                                         | 1.03 (0.000189)   | 2.93 (1.2e-06)  | 2.17 (0.000867); 3.47 (4.27e-06) |
| ILC                                         | 1.05 (0.367)      | 0 (0.998)       | 2.821 (0.108); 0 (0.998)         |

Regardless of the cutoff, the results remain consistent with the TAILORx, continuous and OncotypeDx scores all providing significance RS in IDC but no significance in ILC. We do however note the challenge in such studies of the low number of patients with ILC.

**Supplementary Table 8:** Time to recurrence (DFS) of different metastatic sites.

| Median DFS (Month) | Bone    | Liver  | Lung   | CNS    | Distant LN | Peritoneum |
|--------------------|---------|--------|--------|--------|------------|------------|
| Overall            | 43.00   | 41.00  | 48.00  | 40.00  | 50.00      | 52.00      |
| IDC                | 42.00   | 40.00  | 47.00  | 41.00  | 50.00      | 44.00      |
| ILC                | 55.00   | 42.49  | 62.69  | 34.50  | 56.00      | 59.50      |
| P-value*           | 0.07332 | 0.4947 | 0.4853 | 0.5679 | 0.1596     | 0.05917    |



### Supplementary Figure 1: Missingness of data by year of diagnosis.

We consider the data is missing completely at random. The main reason of missingness is the record time. We first showcase the missing patterns across years. The missing rate of ER, PR, and HER2 drops dramatically in 2004, 2004, and 2010 respectively. The missing rate of BMI and Grade starts to decrease in 2000 and 2001, and the missing rate of stage is relatively stable. There is nearly no missingness for age, OS and DFS. We next evaluate the missing pattern of each variable in ER+ group separately by fitting the logistic regression of missing pattern against histology type, the variable of interest, after adjusting for the other clinical variables (Age, BMI, PR, HER2, Stage, Grade, OS, DFS), and the results show that there is no significant relation between missing patterns and the histology type. (p-values are listed in the table).

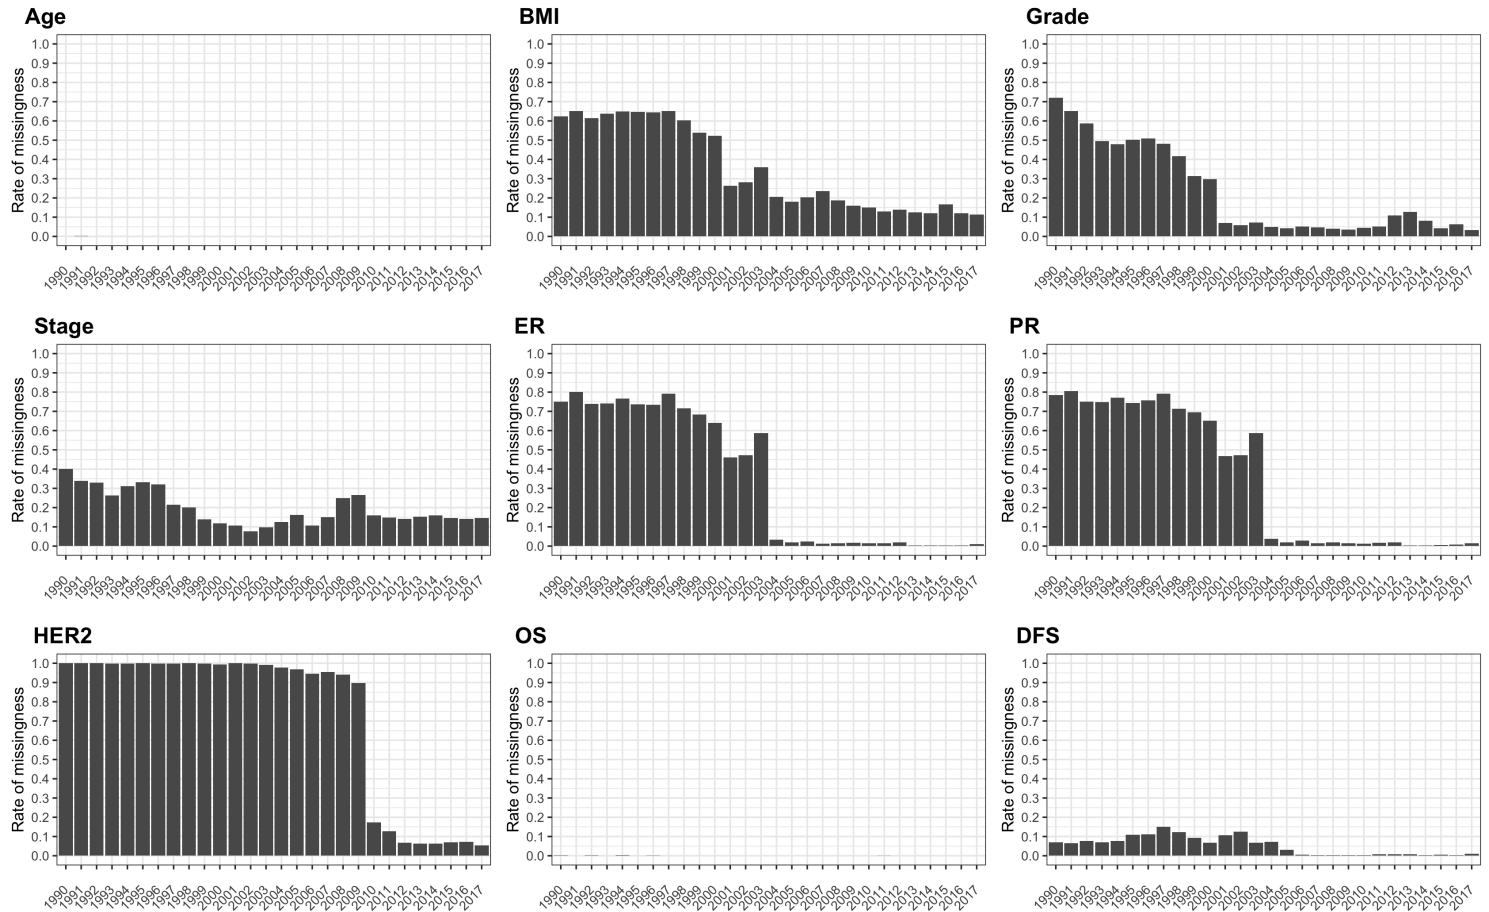

| Variable | Start from | P-value |
|----------|------------|---------|
| BMI      | 1990       | 0.9406  |
| Grade    | 1990       | 0.8641  |
| Stage    | 1990       | 0.4819  |
| PR       | 1990       | 0.8212  |
| HER2     | 2010       | 0.7065  |
| DFS      | 1990       | 0.3118  |

# Supplementary Figure 2

A

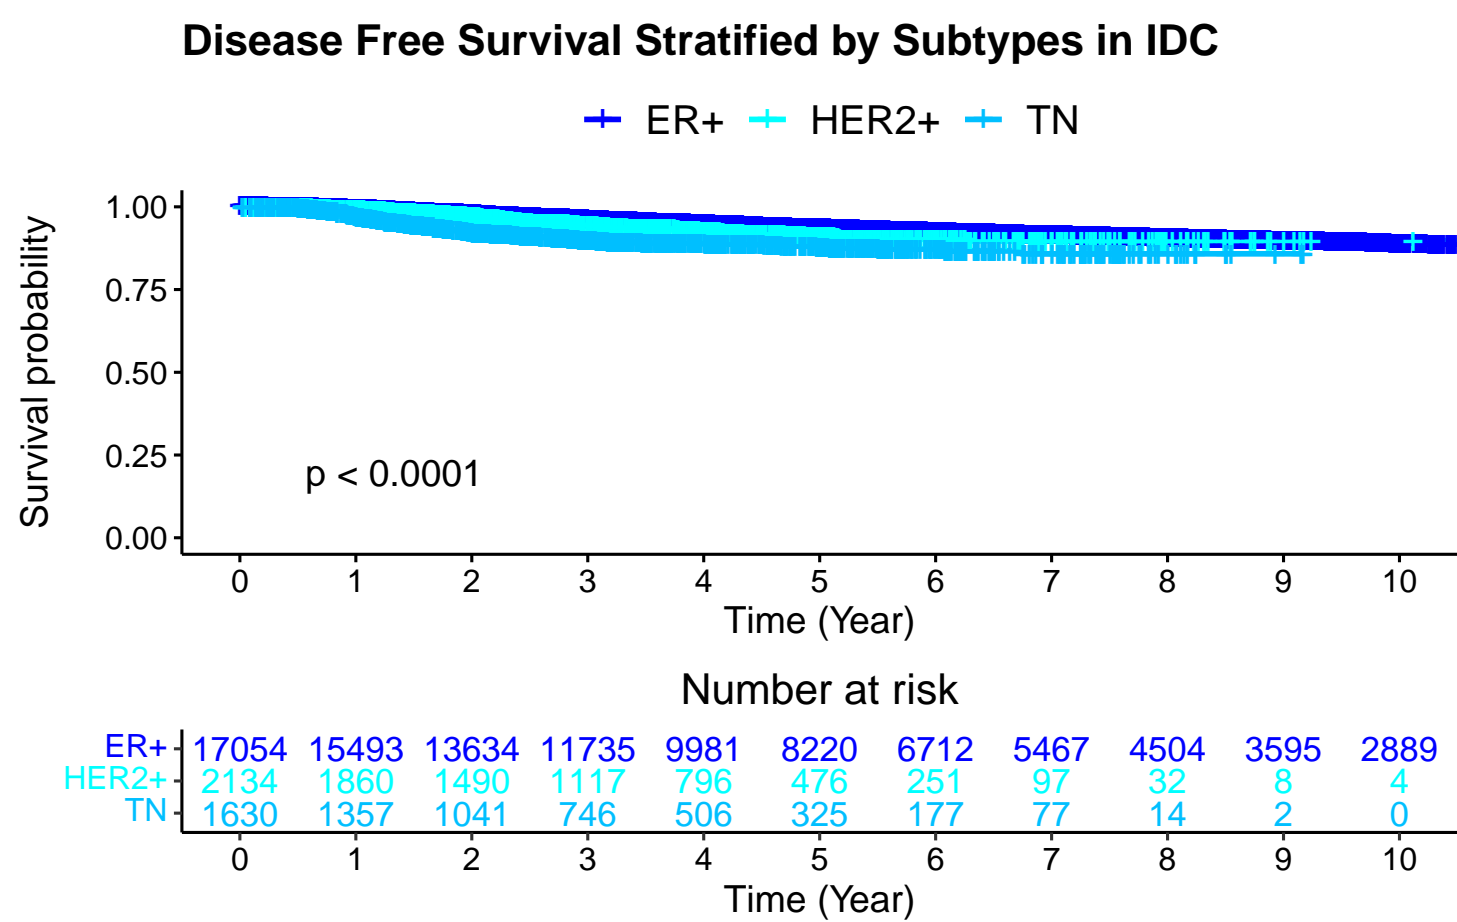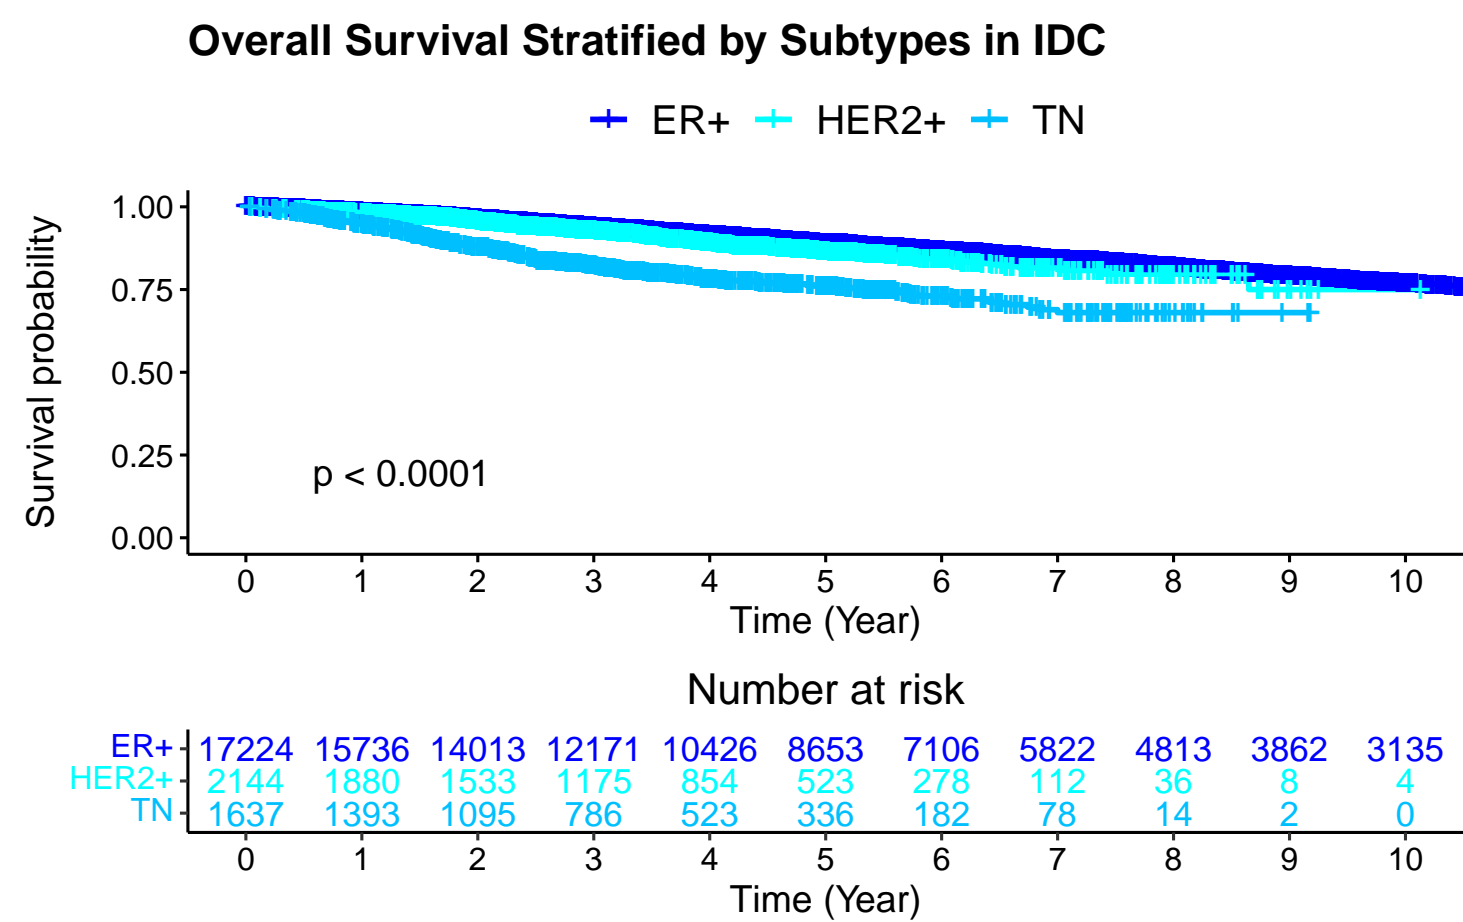

B

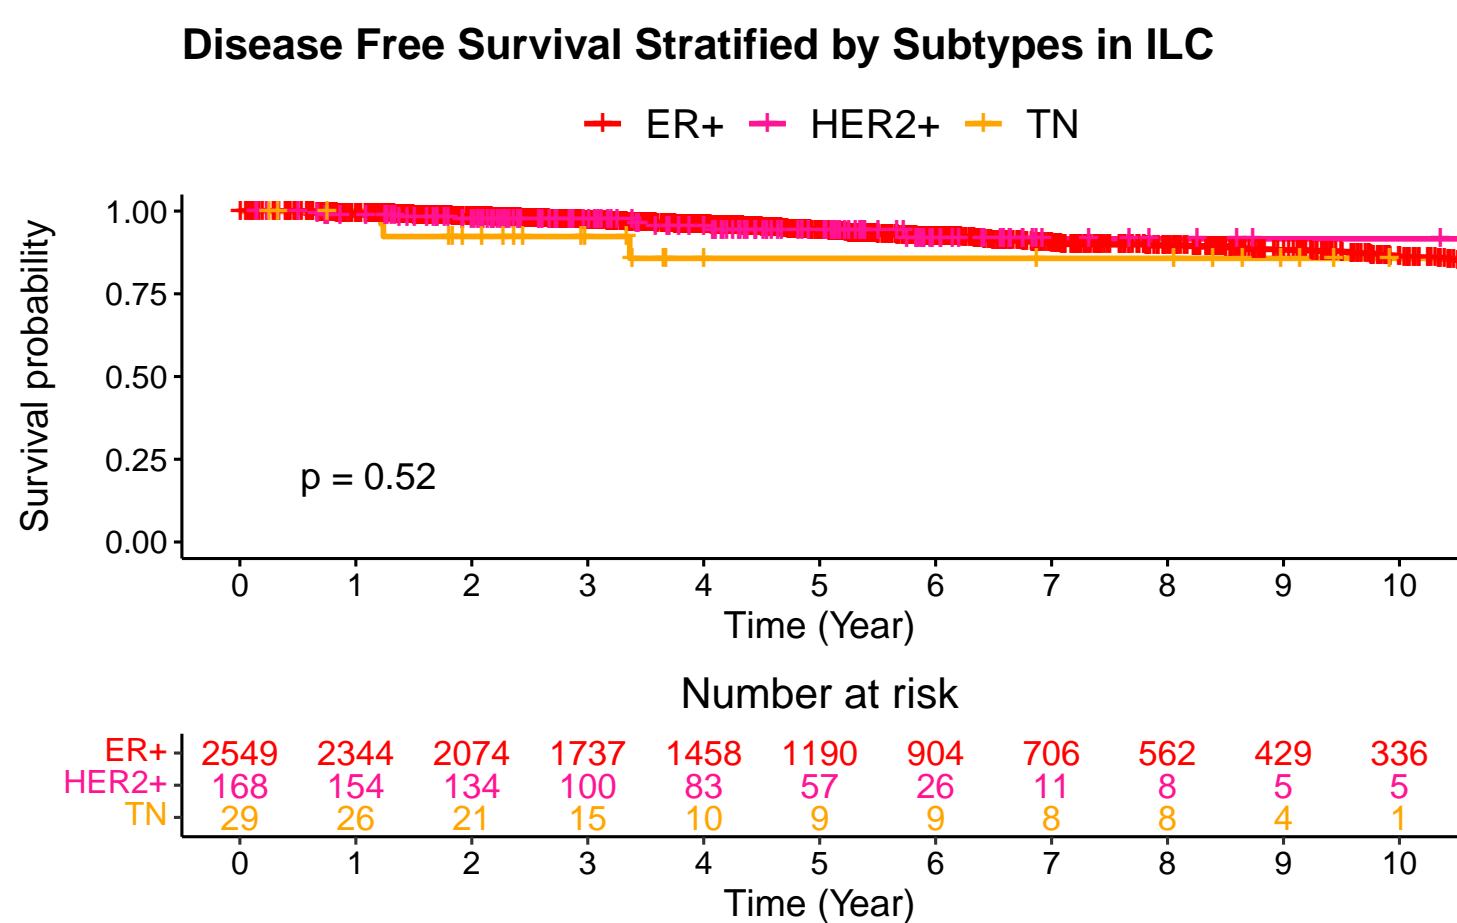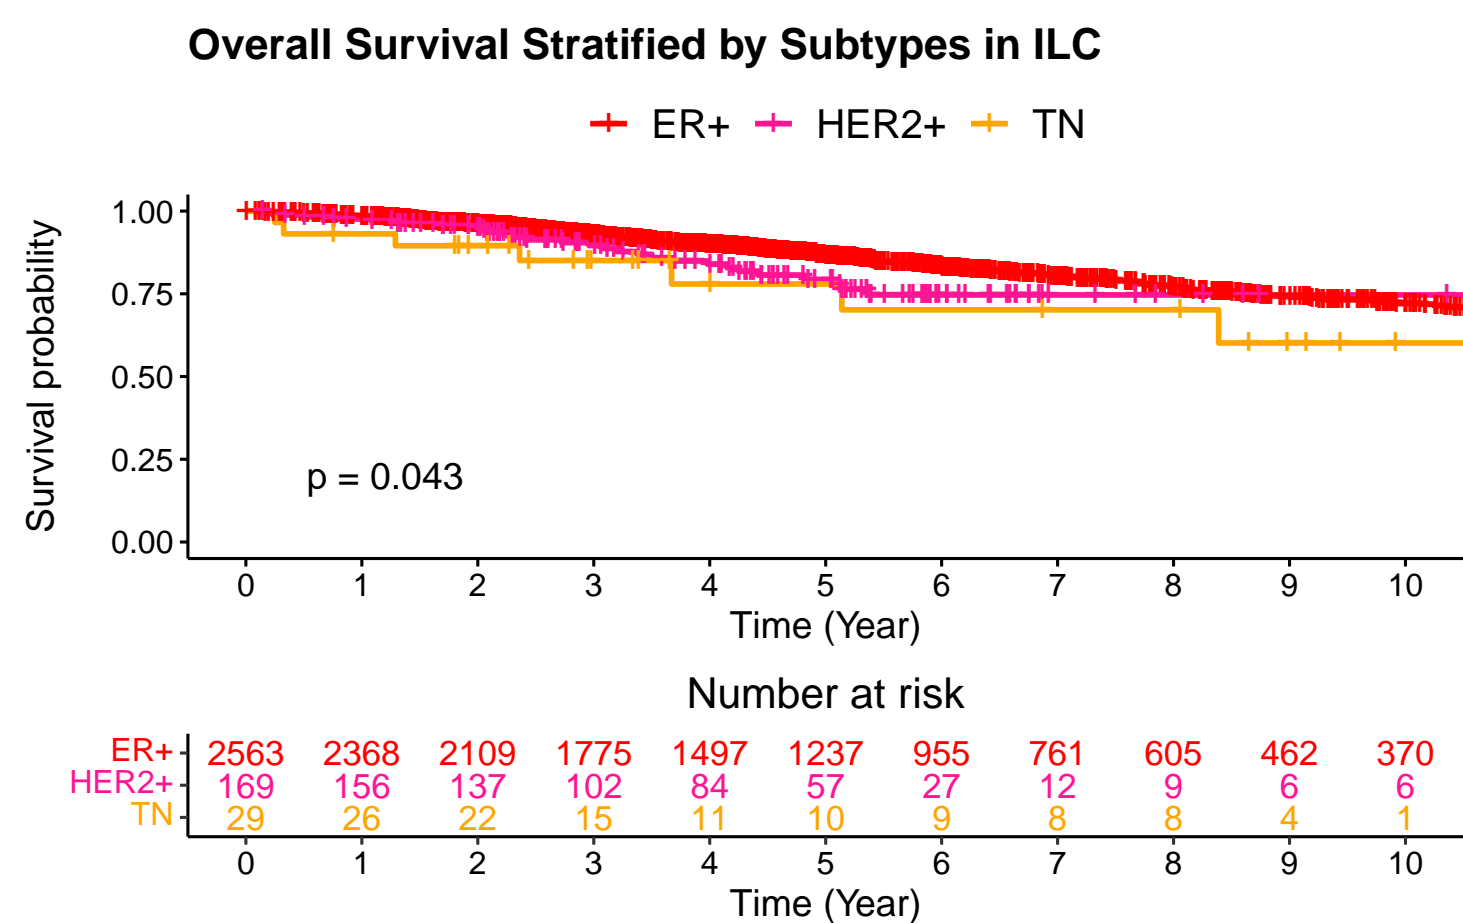

C

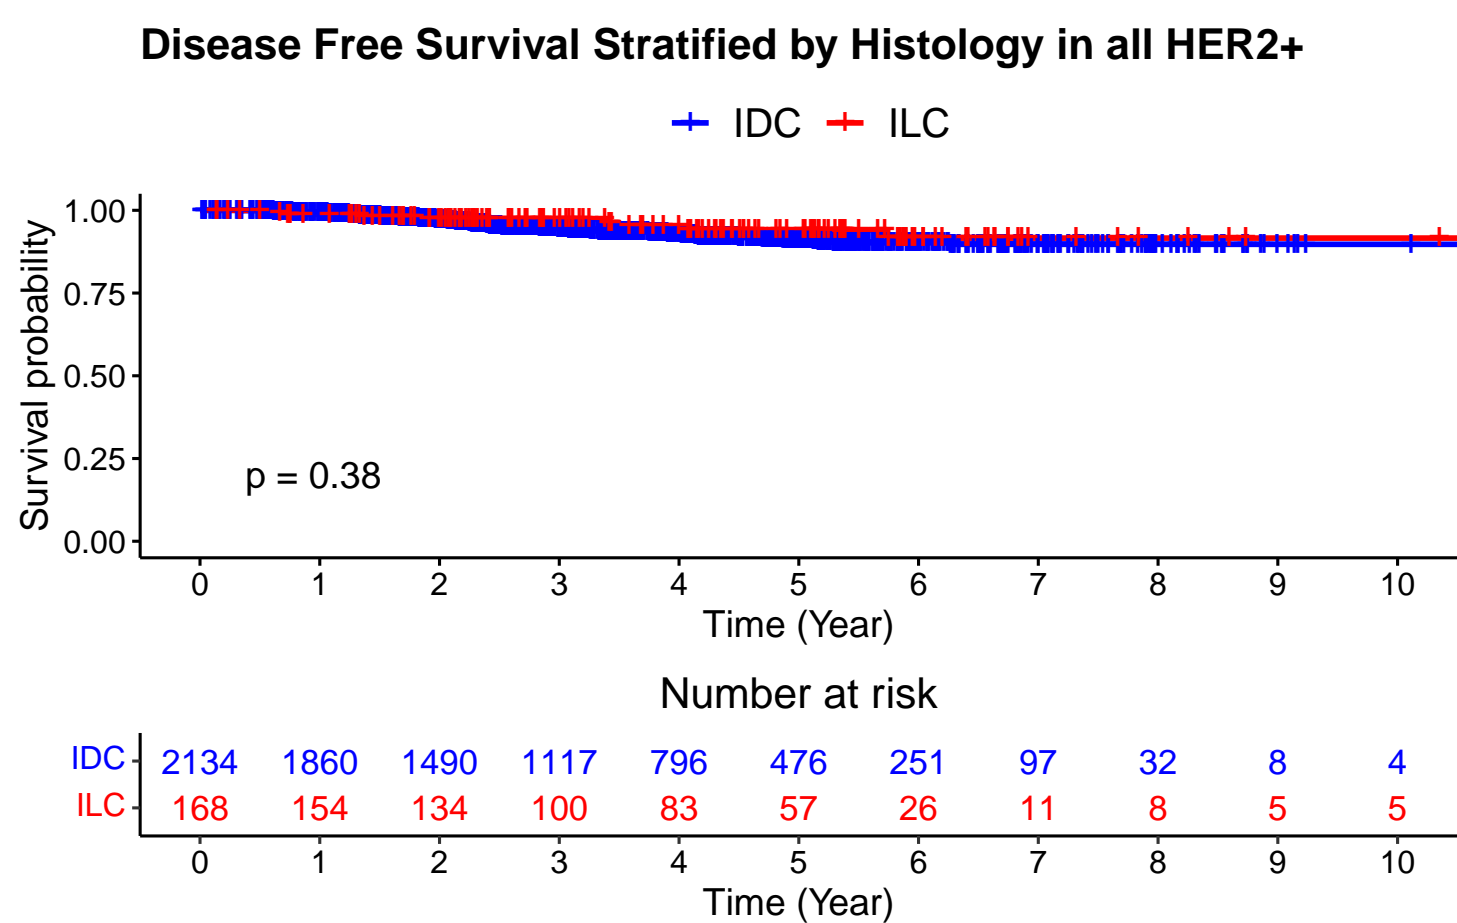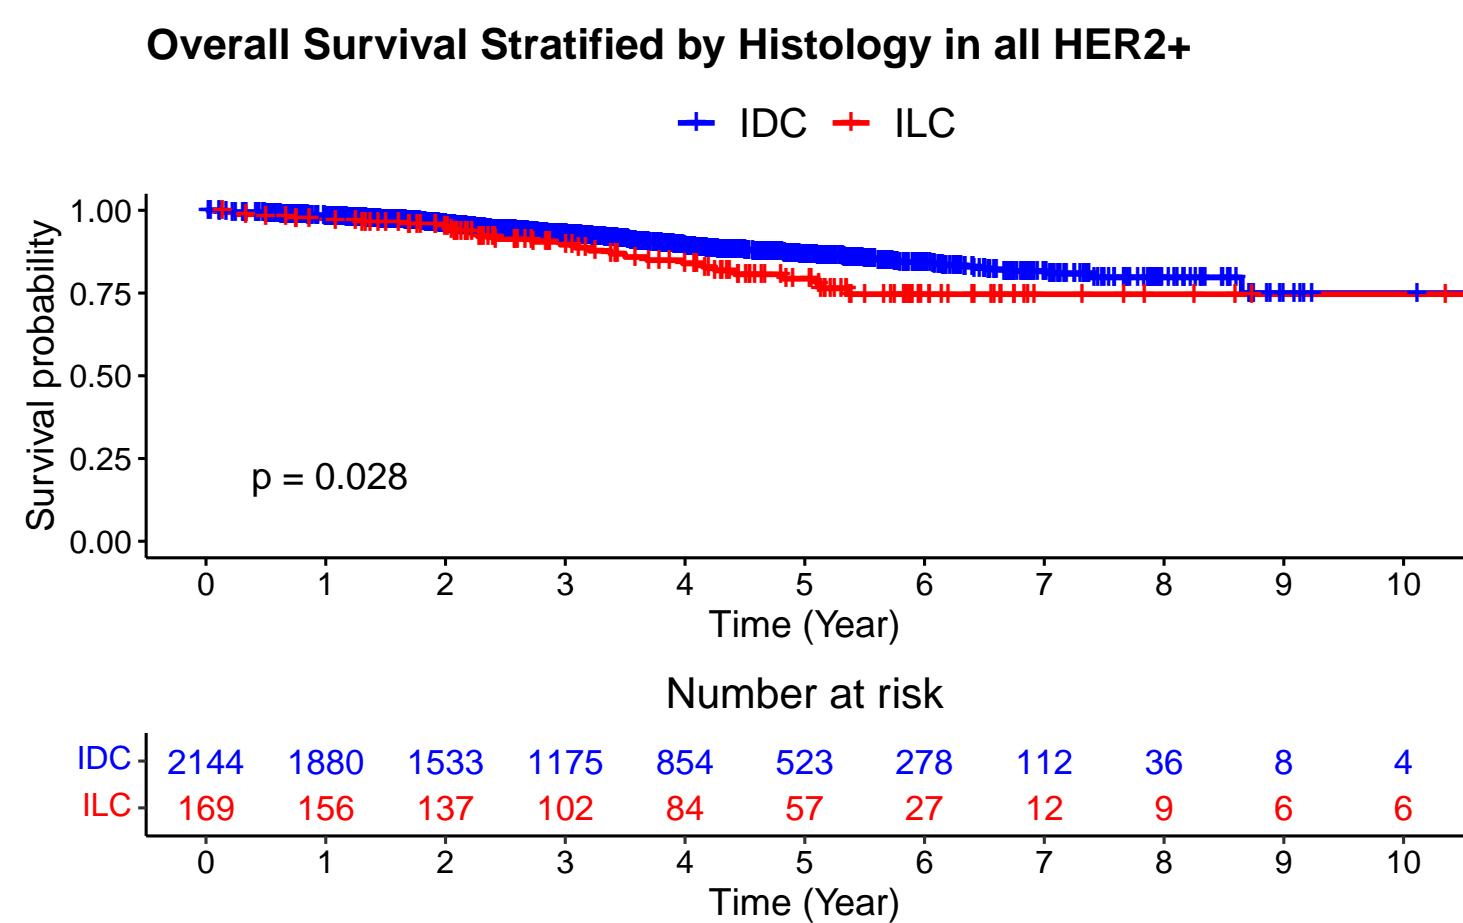

D

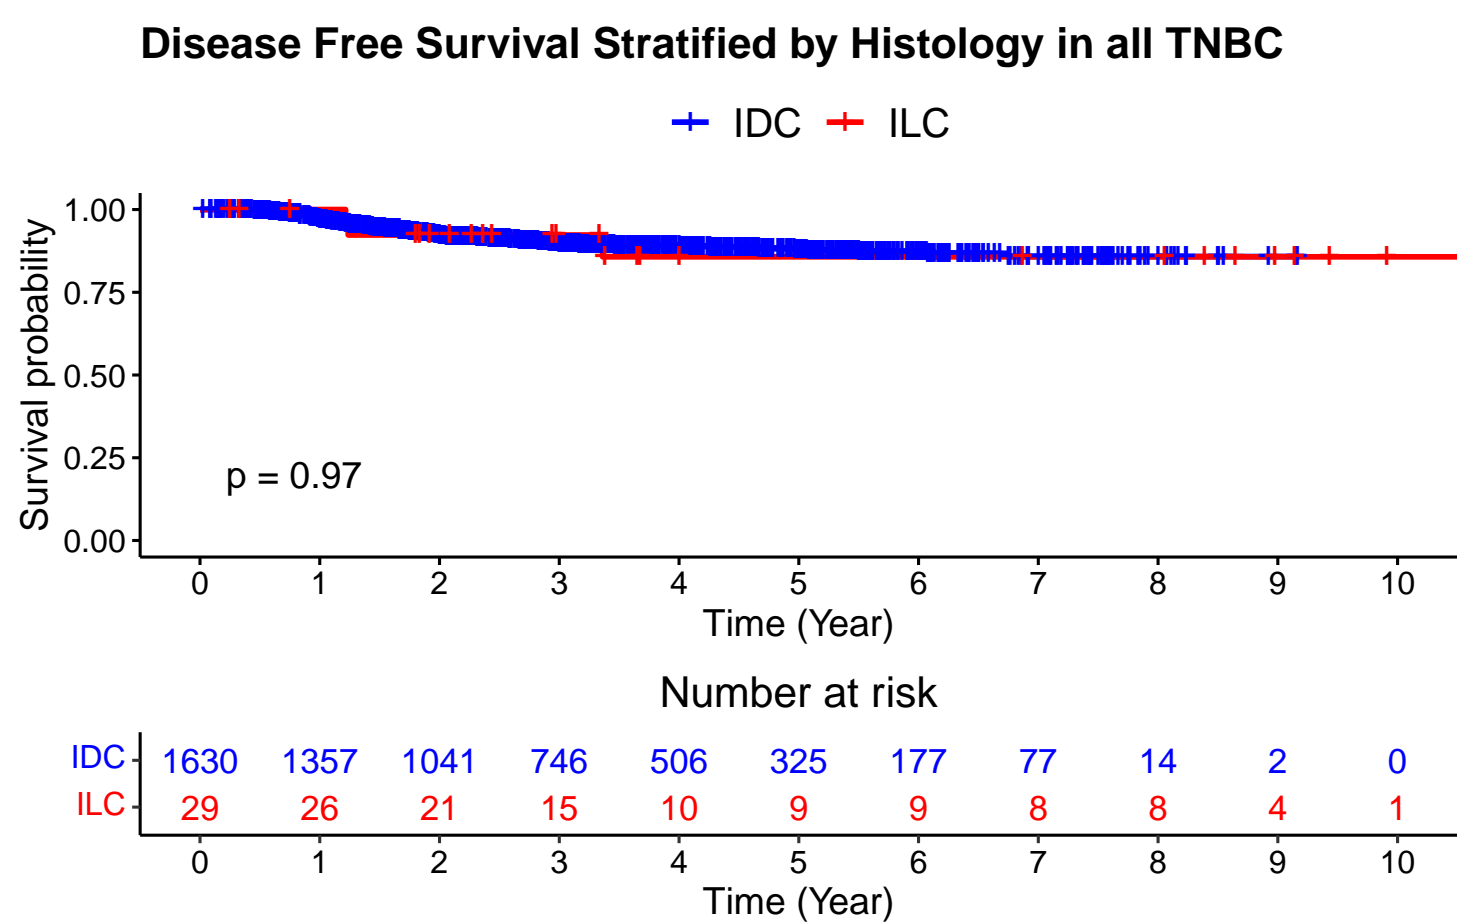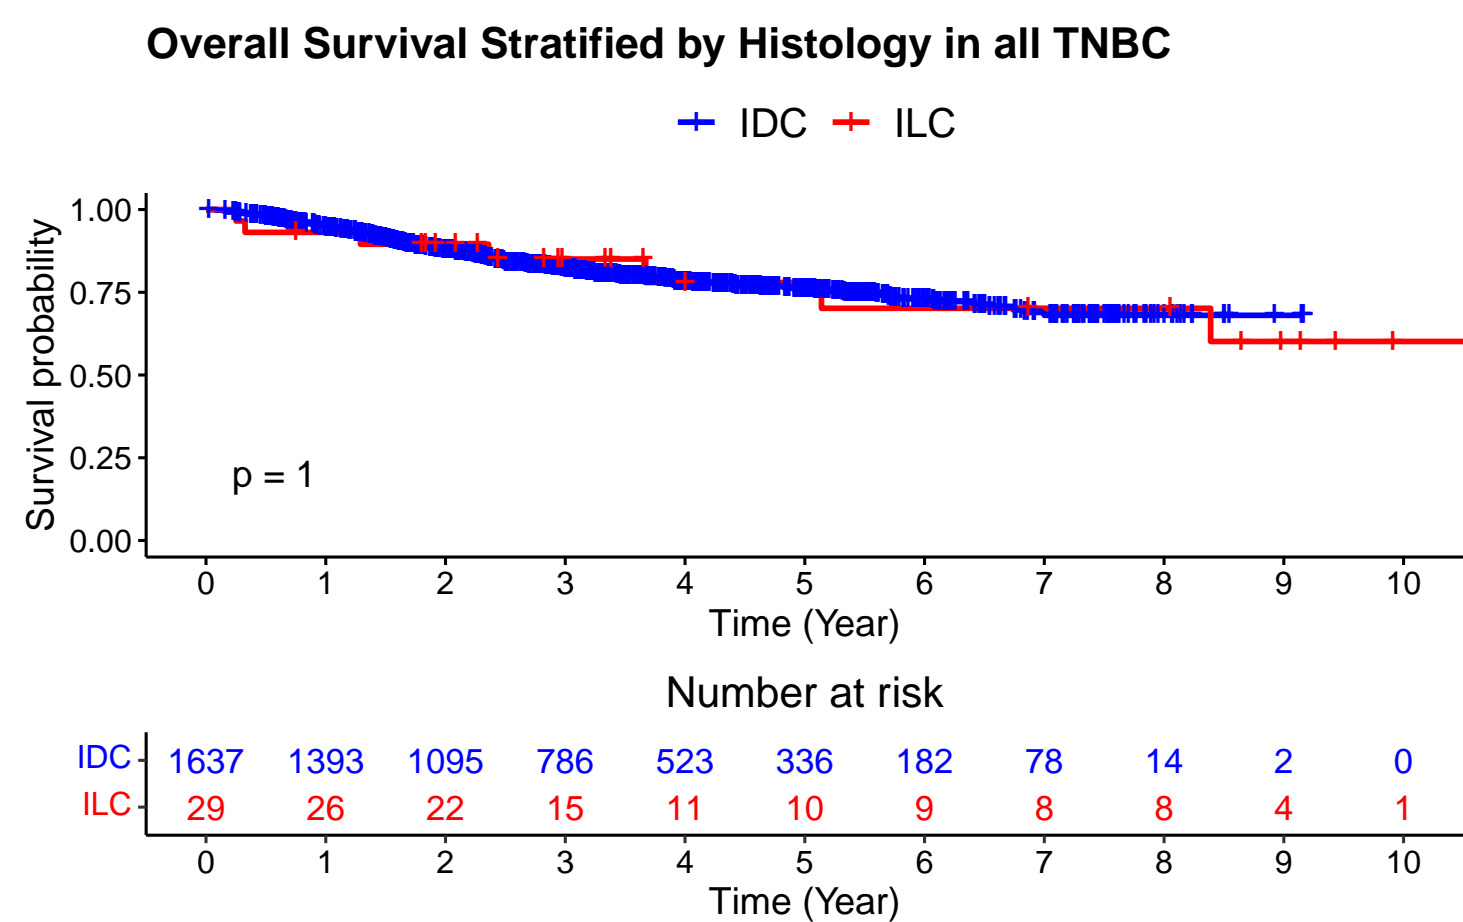

# Supplementary Figure 3A: Survival curves stratified by OncotypeDX TAILORx Cutoff in patients with node negative disease

A

**Disease Free Survival Stratified by TAILORx Cutoff in ER+, N0 Breast Cancer**

— High — Low

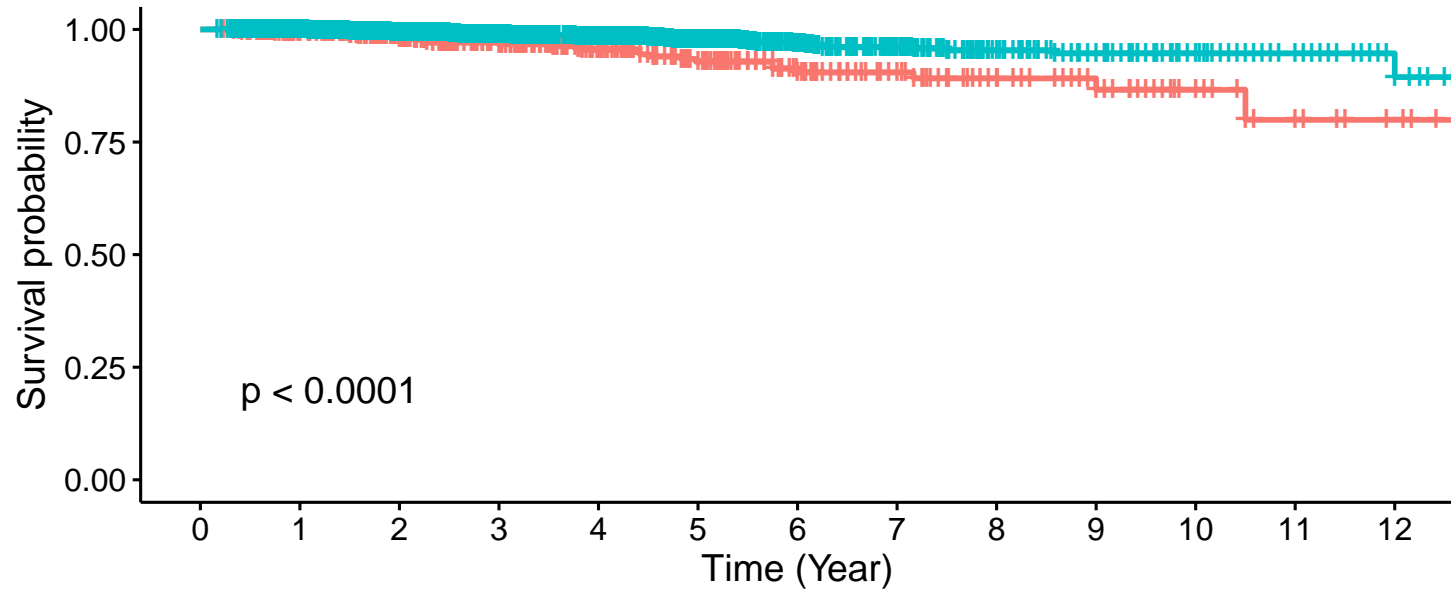

Number at risk

|      |      |      |      |      |      |     |     |     |     |     |    |    |    |
|------|------|------|------|------|------|-----|-----|-----|-----|-----|----|----|----|
| High | 463  | 404  | 341  | 275  | 217  | 159 | 108 | 74  | 47  | 35  | 17 | 10 | 5  |
| Low  | 2467 | 2192 | 1855 | 1475 | 1178 | 824 | 516 | 324 | 203 | 123 | 71 | 42 | 18 |
|      | 0    | 1    | 2    | 3    | 4    | 5   | 6   | 7   | 8   | 9   | 10 | 11 | 12 |

**Overall Survival Stratified by TAILORx Cutoff in ER+, N0 Breast Cancer**

— High — Low

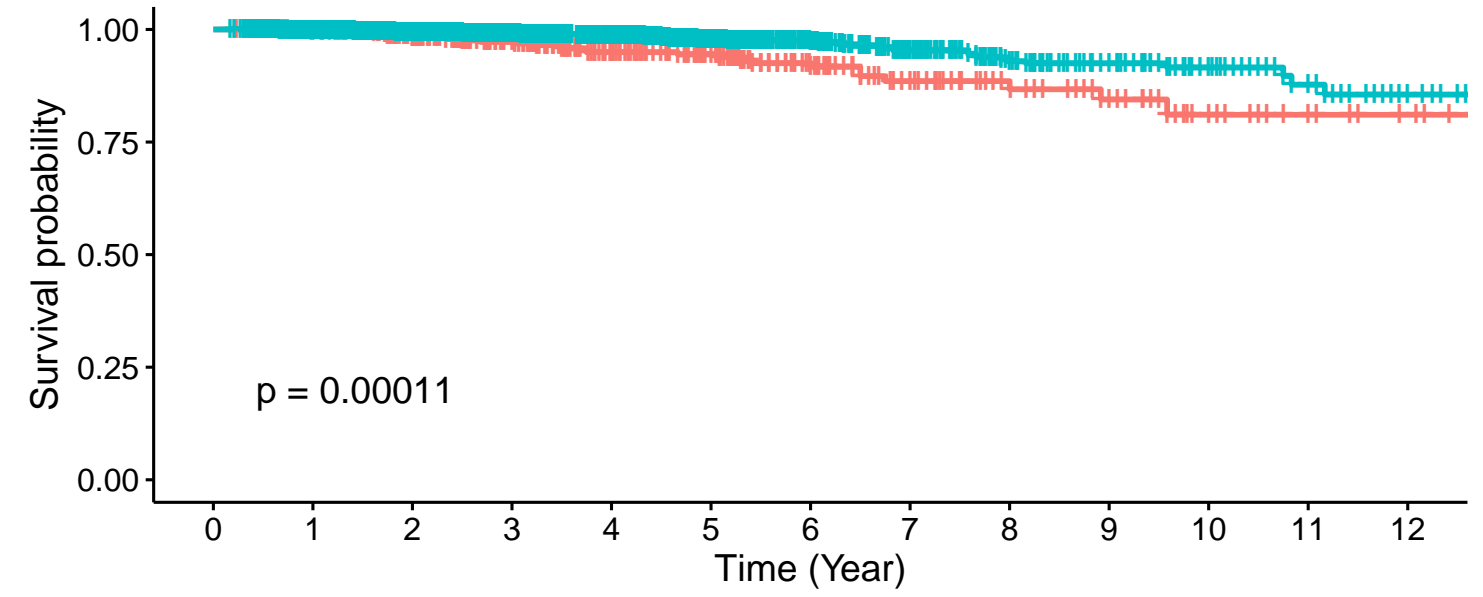

Number at risk

|      |      |      |      |      |      |     |     |     |     |     |    |    |    |
|------|------|------|------|------|------|-----|-----|-----|-----|-----|----|----|----|
| High | 463  | 407  | 347  | 283  | 225  | 167 | 114 | 75  | 49  | 36  | 18 | 11 | 5  |
| Low  | 2467 | 2195 | 1867 | 1493 | 1196 | 843 | 534 | 338 | 213 | 127 | 74 | 44 | 18 |
|      | 0    | 1    | 2    | 3    | 4    | 5   | 6   | 7   | 8   | 9   | 10 | 11 | 12 |

B

**Disease Free Survival Stratified by TAILORx Cutoff in IDC ER+, N0 Breast Cancer**

— High — Low

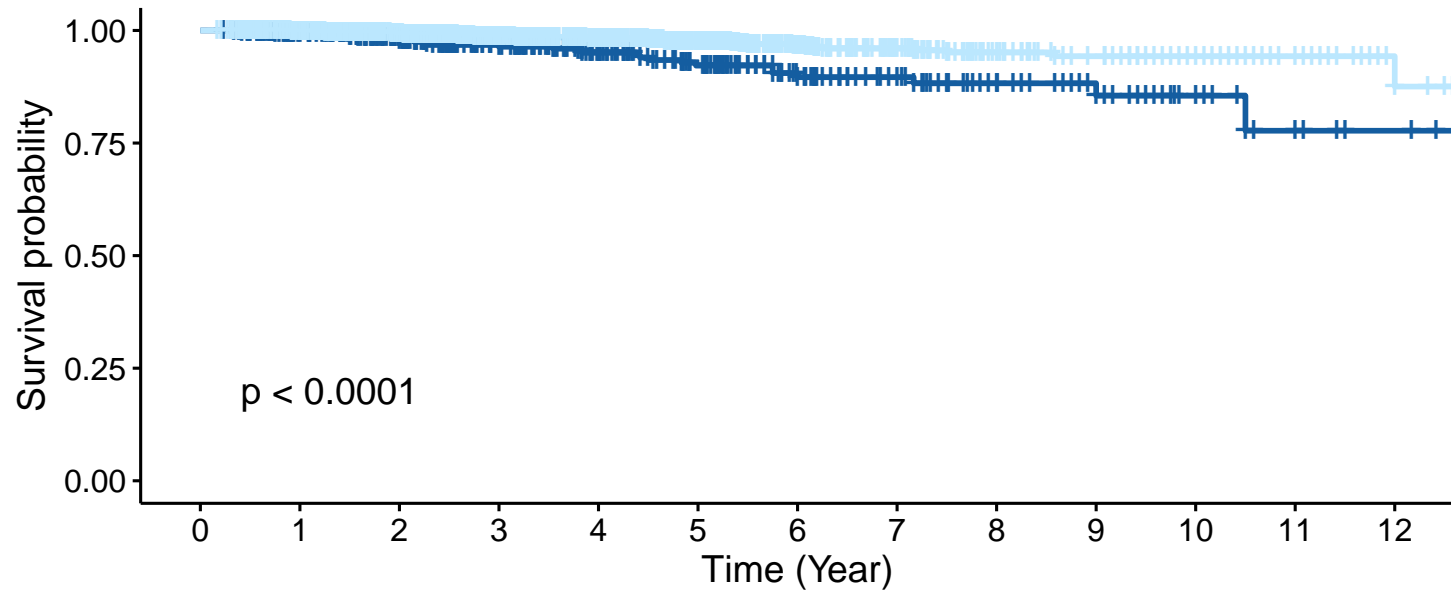

Number at risk

|      |      |      |      |      |     |     |     |     |     |    |    |    |    |
|------|------|------|------|------|-----|-----|-----|-----|-----|----|----|----|----|
| High | 429  | 372  | 310  | 249  | 200 | 146 | 100 | 70  | 44  | 32 | 15 | 8  | 4  |
| Low  | 2057 | 1818 | 1527 | 1210 | 967 | 668 | 417 | 262 | 164 | 98 | 56 | 36 | 14 |
|      | 0    | 1    | 2    | 3    | 4   | 5   | 6   | 7   | 8   | 9  | 10 | 11 | 12 |

**Overall Survival Stratified by TAILORx Cutoff in IDC ER+, N0 Breast Cancer**

— High — Low

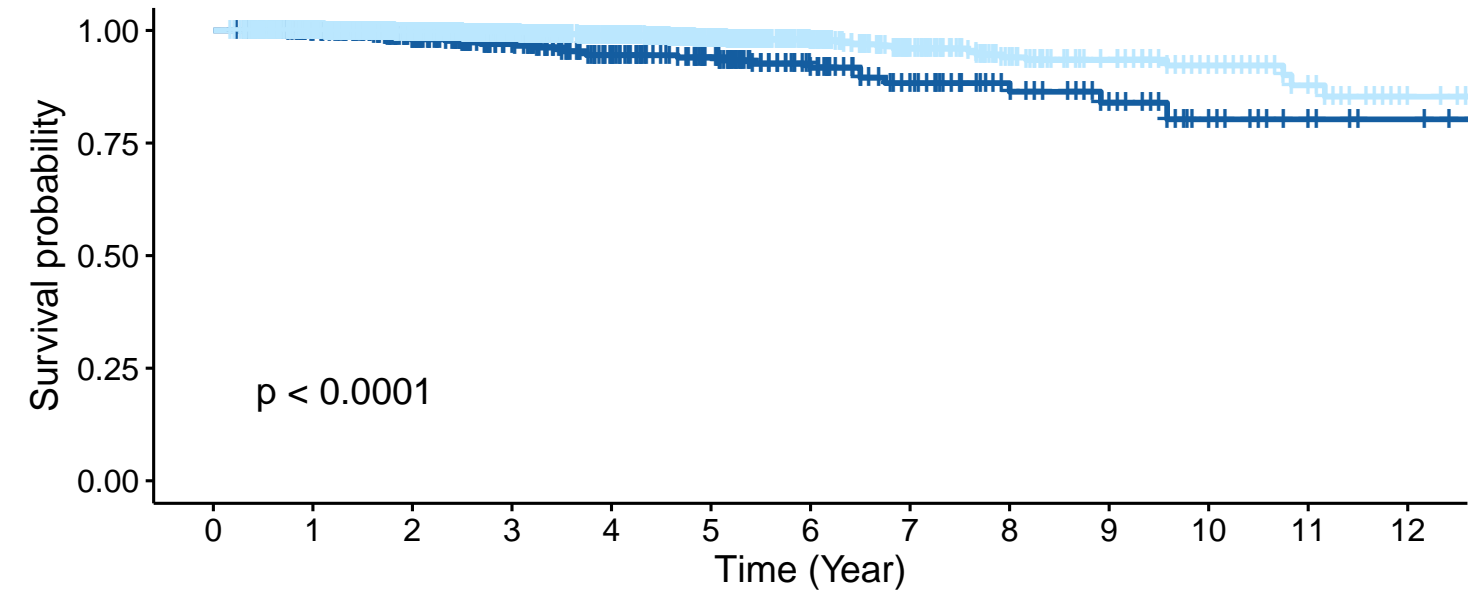

Number at risk

|      |      |      |      |      |     |     |     |     |     |     |    |    |    |
|------|------|------|------|------|-----|-----|-----|-----|-----|-----|----|----|----|
| High | 429  | 375  | 316  | 257  | 208 | 154 | 106 | 71  | 46  | 33  | 16 | 9  | 4  |
| Low  | 2057 | 1821 | 1539 | 1227 | 983 | 685 | 432 | 273 | 174 | 102 | 59 | 38 | 14 |
|      | 0    | 1    | 2    | 3    | 4   | 5   | 6   | 7   | 8   | 9   | 10 | 11 | 12 |

C

**Disease Free Survival Stratified by TAILORx Cutoff in ILC ER+, N0 Breast Cancer**

— High — Low

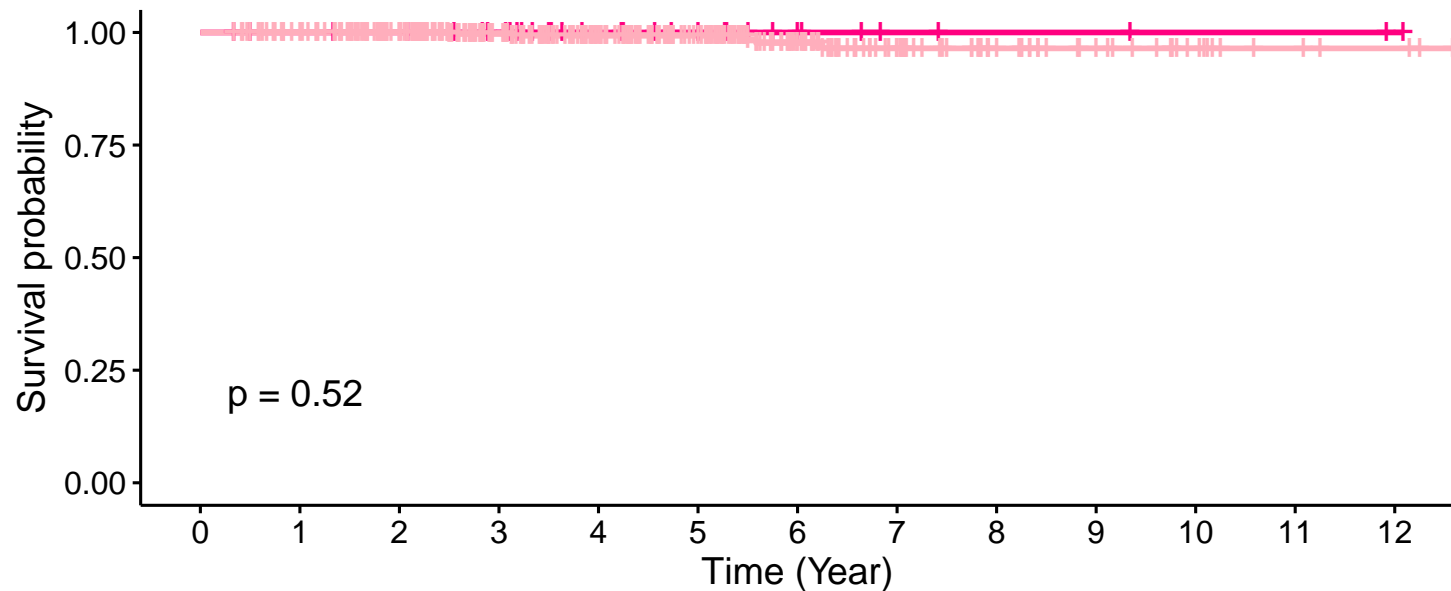

Number at risk

|      |     |     |     |     |     |     |    |    |    |    |    |    |    |
|------|-----|-----|-----|-----|-----|-----|----|----|----|----|----|----|----|
| High | 34  | 32  | 31  | 26  | 17  | 13  | 8  | 4  | 3  | 3  | 2  | 2  | 1  |
| Low  | 410 | 374 | 328 | 265 | 211 | 156 | 99 | 62 | 39 | 25 | 15 | 6  | 4  |
|      | 0   | 1   | 2   | 3   | 4   | 5   | 6  | 7  | 8  | 9  | 10 | 11 | 12 |

**Overall Survival Stratified by TAILORx Cutoff in ILC ER+, N0 Breast Cancer**

— High — Low

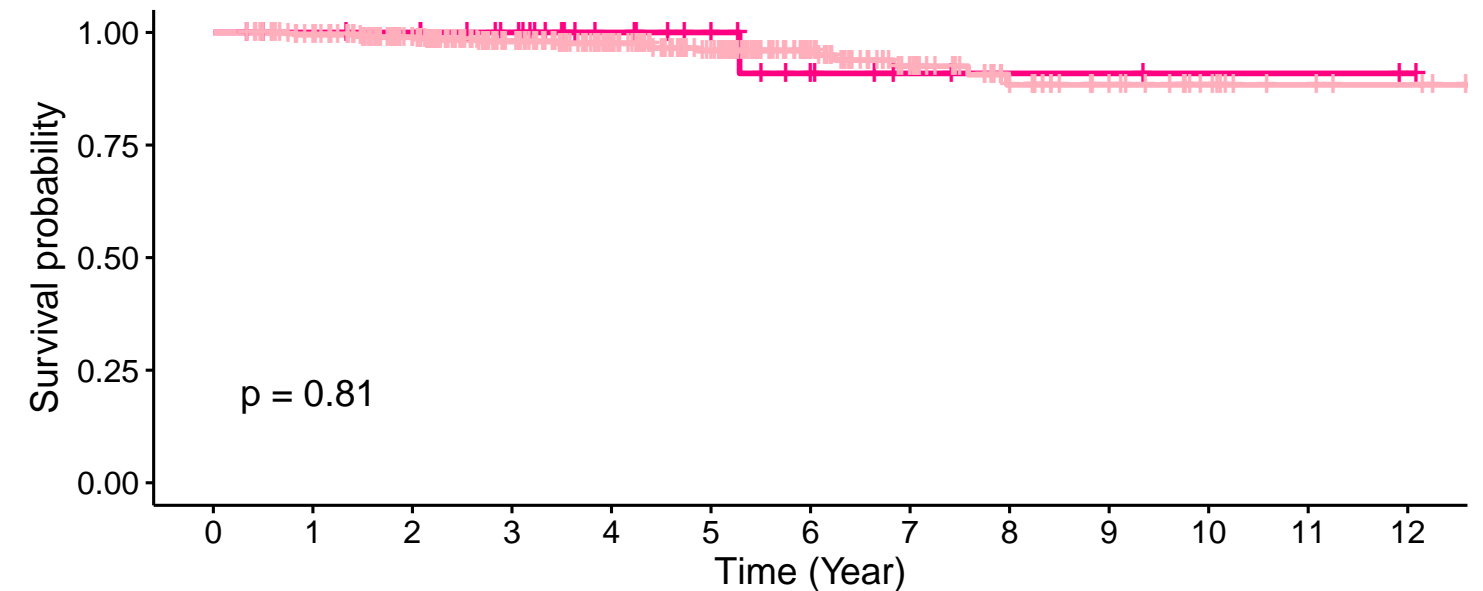

Number at risk

|      |     |     |     |     |     |     |     |    |    |    |    |    |    |
|------|-----|-----|-----|-----|-----|-----|-----|----|----|----|----|----|----|
| High | 34  | 32  | 31  | 26  | 17  | 13  | 8   | 4  | 3  | 3  | 2  | 2  | 1  |
| Low  | 410 | 374 | 328 | 266 | 213 | 158 | 102 | 65 | 39 | 25 | 15 | 6  | 4  |
|      | 0   | 1   | 2   | 3   | 4   | 5   | 6   | 7  | 8  | 9  | 10 | 11 | 12 |

# Supplementary Figure 3B: Survival curves stratified by OncotypeDX TAILORx Cutoff in patients with node positive disease

A

**Disease Free Survival Stratified by TAILORx Cutoff in ER+, Node Positive Disease**

High Low

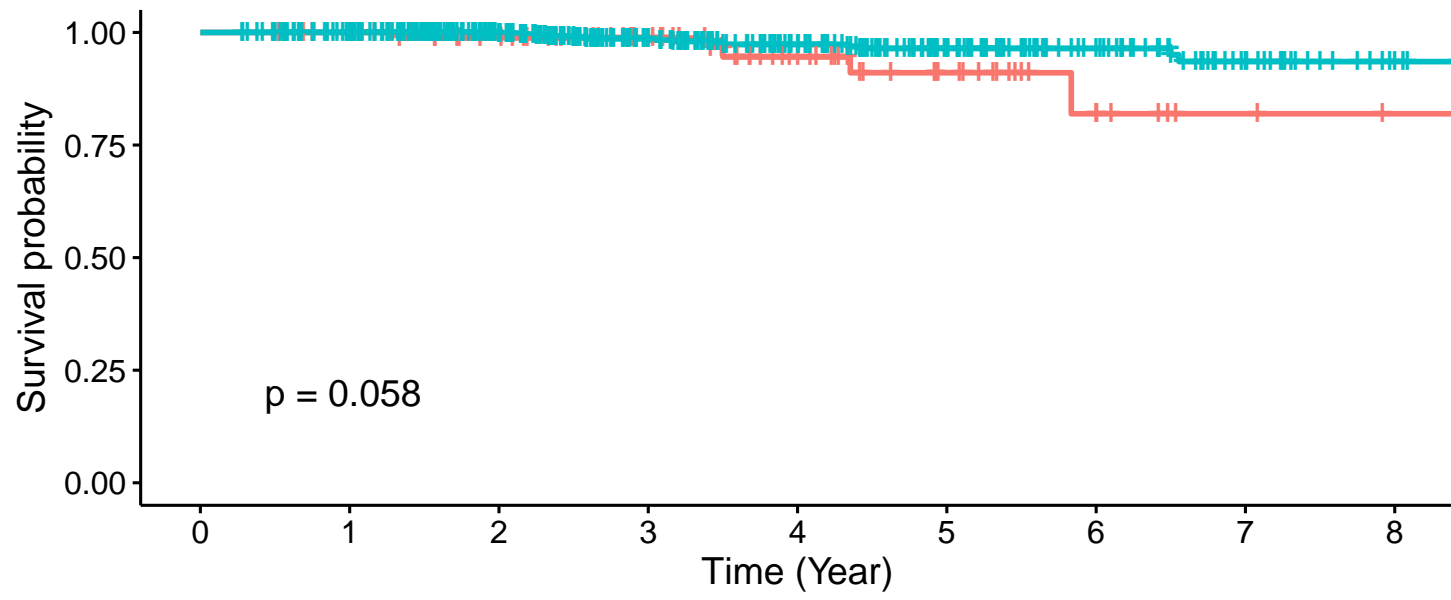

Number at risk

|      |     |     |     |     |     |     |    |    |    |
|------|-----|-----|-----|-----|-----|-----|----|----|----|
| High | 91  | 87  | 74  | 55  | 34  | 20  | 9  | 3  | 1  |
| Low  | 619 | 570 | 462 | 343 | 250 | 165 | 93 | 49 | 18 |
|      | 0   | 1   | 2   | 3   | 4   | 5   | 6  | 7  | 8  |

**Overall Survival Stratified by TAILORx Cutoff in ER+, Node Positive Disease**

High Low

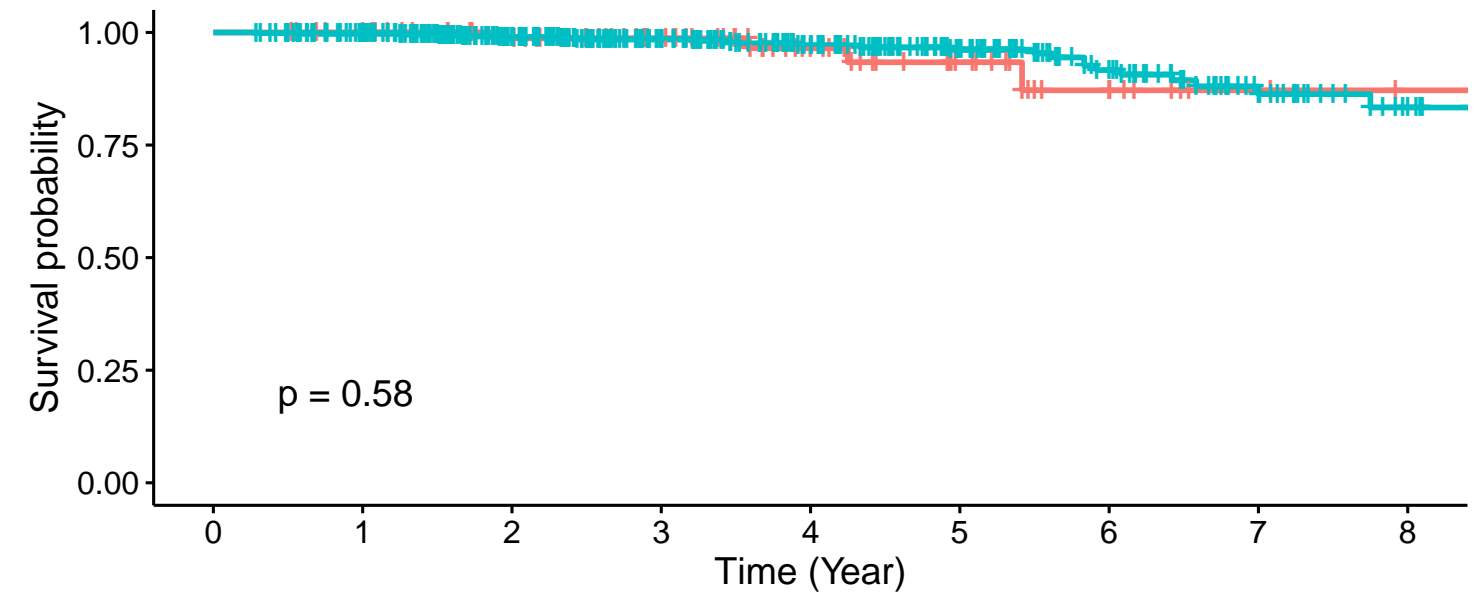

Number at risk

|      |     |     |     |     |     |     |    |    |    |
|------|-----|-----|-----|-----|-----|-----|----|----|----|
| High | 91  | 87  | 75  | 56  | 35  | 21  | 10 | 3  | 1  |
| Low  | 619 | 570 | 462 | 347 | 255 | 170 | 94 | 52 | 20 |
|      | 0   | 1   | 2   | 3   | 4   | 5   | 6  | 7  | 8  |

B

**Disease Free Survival Stratified by TAILORx Cutoff in IDC ER+, Node Positive Disease**

High Low

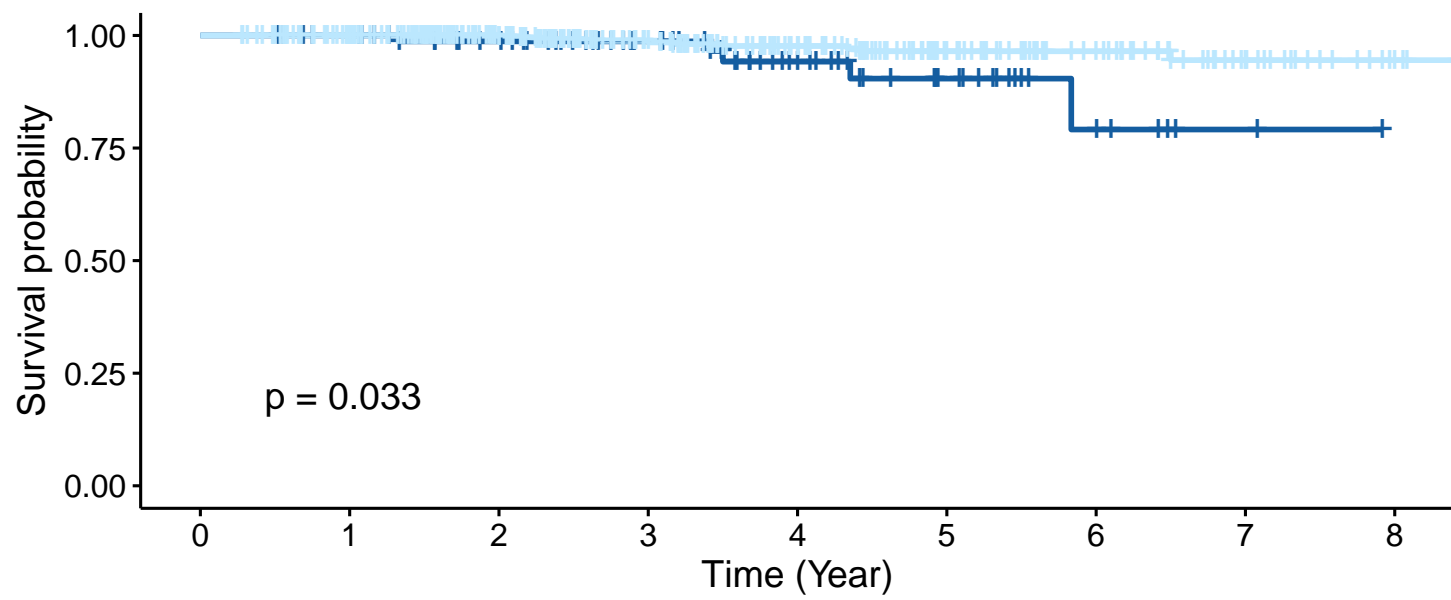

Number at risk

|      |     |     |     |     |     |     |    |    |    |
|------|-----|-----|-----|-----|-----|-----|----|----|----|
| High | 85  | 81  | 69  | 51  | 31  | 18  | 7  | 2  | 0  |
| Low  | 491 | 447 | 364 | 276 | 192 | 122 | 70 | 36 | 14 |
|      | 0   | 1   | 2   | 3   | 4   | 5   | 6  | 7  | 8  |

**Overall Survival Stratified by TAILORx Cutoff in IDC ER+, Node Positive Disease**

High Low

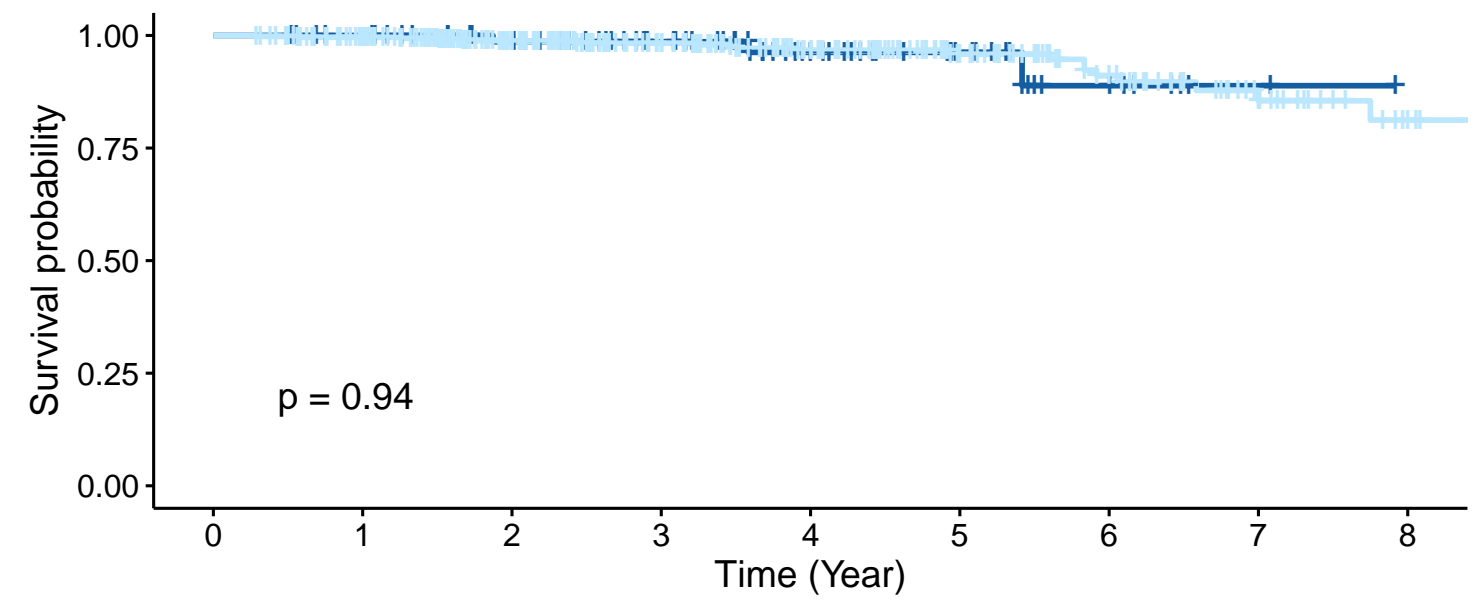

Number at risk

|      |     |     |     |     |     |     |    |    |    |
|------|-----|-----|-----|-----|-----|-----|----|----|----|
| High | 85  | 81  | 70  | 52  | 32  | 19  | 8  | 2  | 0  |
| Low  | 491 | 447 | 364 | 279 | 195 | 127 | 71 | 38 | 15 |
|      | 0   | 1   | 2   | 3   | 4   | 5   | 6  | 7  | 8  |

C

**Disease Free Survival Stratified by TAILORx Cutoff in ILC ER+, Node Positive Disease**

High Low

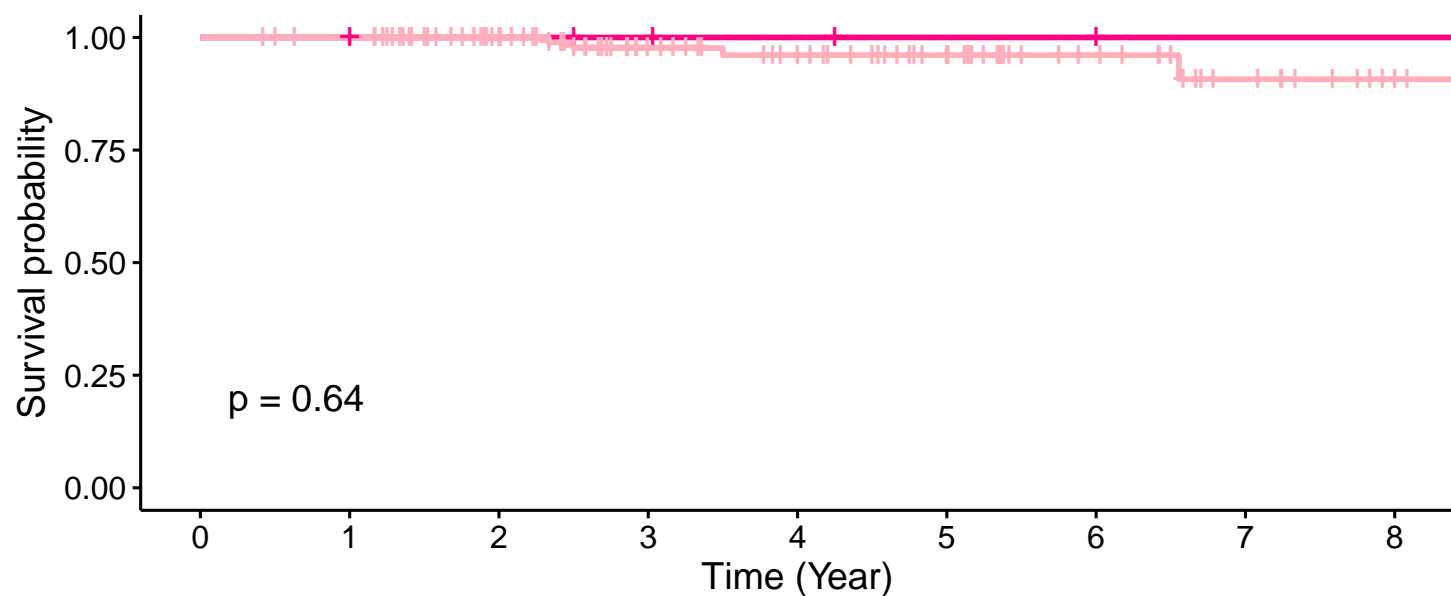

Number at risk

|      |     |     |    |    |    |    |    |    |   |
|------|-----|-----|----|----|----|----|----|----|---|
| High | 6   | 6   | 5  | 4  | 3  | 2  | 2  | 1  | 1 |
| Low  | 128 | 123 | 98 | 67 | 58 | 43 | 23 | 13 | 4 |
|      | 0   | 1   | 2  | 3  | 4  | 5  | 6  | 7  | 8 |

**Overall Survival Stratified by TAILORx Cutoff in ILC ER+, Node Positive Disease**

High Low

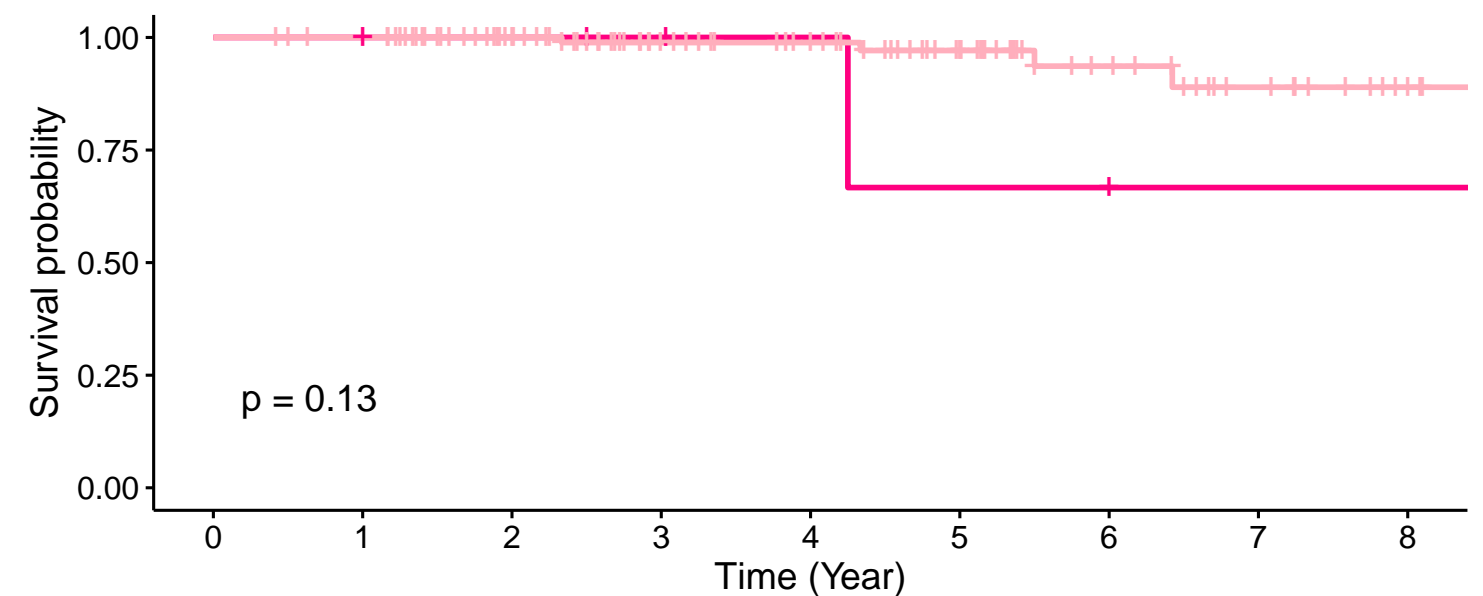

Number at risk

|      |     |     |    |    |    |    |    |    |   |
|------|-----|-----|----|----|----|----|----|----|---|
| High | 6   | 6   | 5  | 4  | 3  | 2  | 2  | 1  | 1 |
| Low  | 128 | 123 | 98 | 68 | 60 | 43 | 23 | 14 | 5 |
|      | 0   | 1   | 2  | 3  | 4  | 5  | 6  | 7  | 8 |

**Supplementary Figure 4: (A)** Site of recurrence of patients from the entire cohort; **(B)** If limiting the cohort to only those diagnosed between 1990 and 2000 to allow for a longer follow up, the site of recurrence is very similar to the result seen in (A).

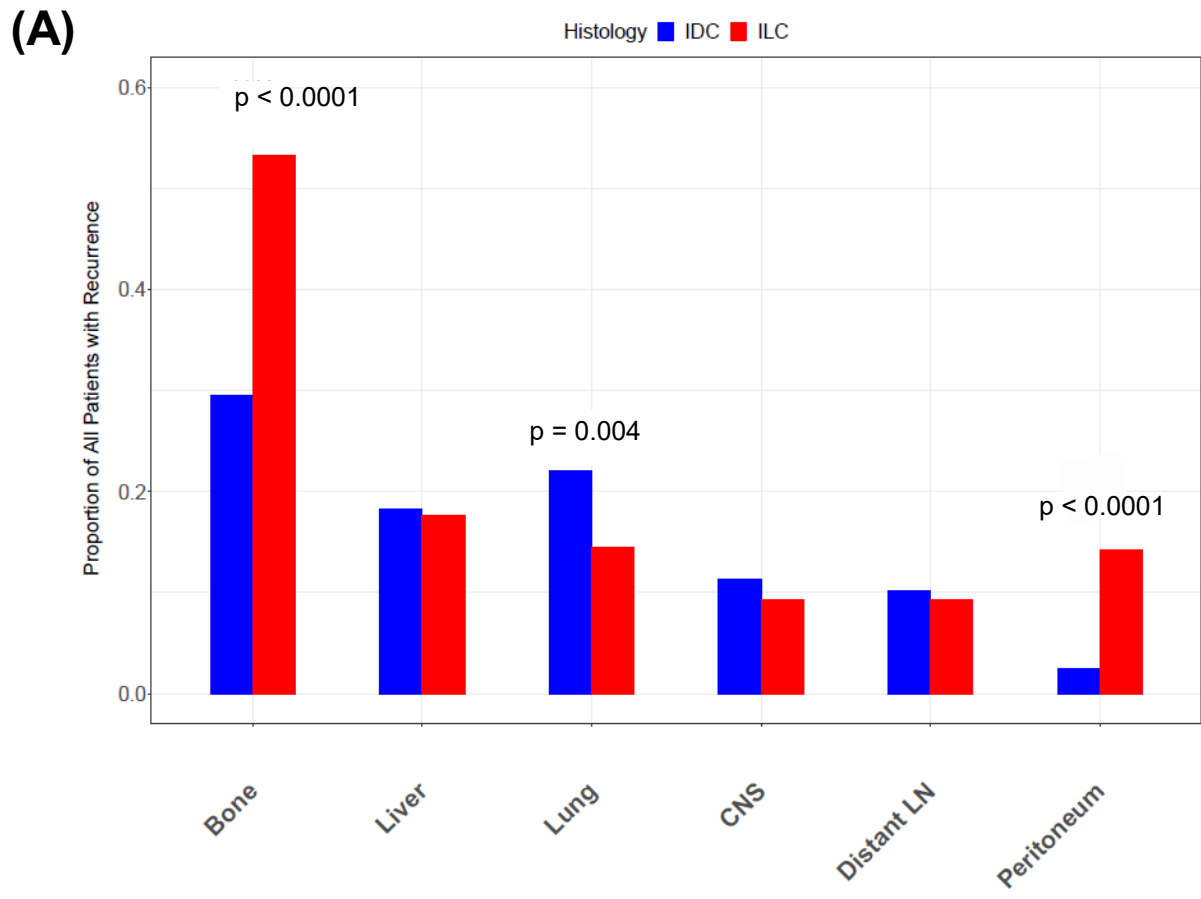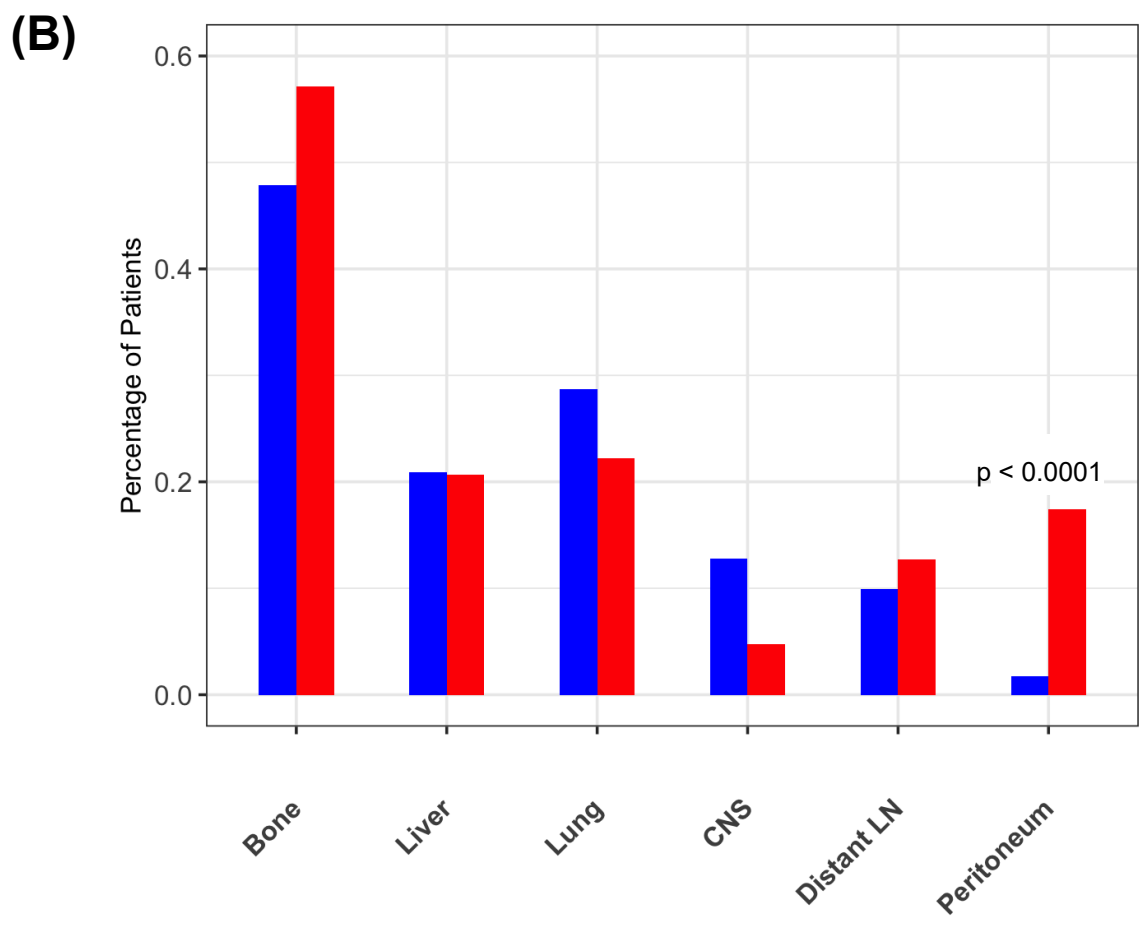

# Supplementary Figure 5: Trends in histology type, tumor size and treatment types in entire cohort

**A** cohort

Trend of Histology Frequency for Each Year in Entire Cohort

Histology — IDC — ILC

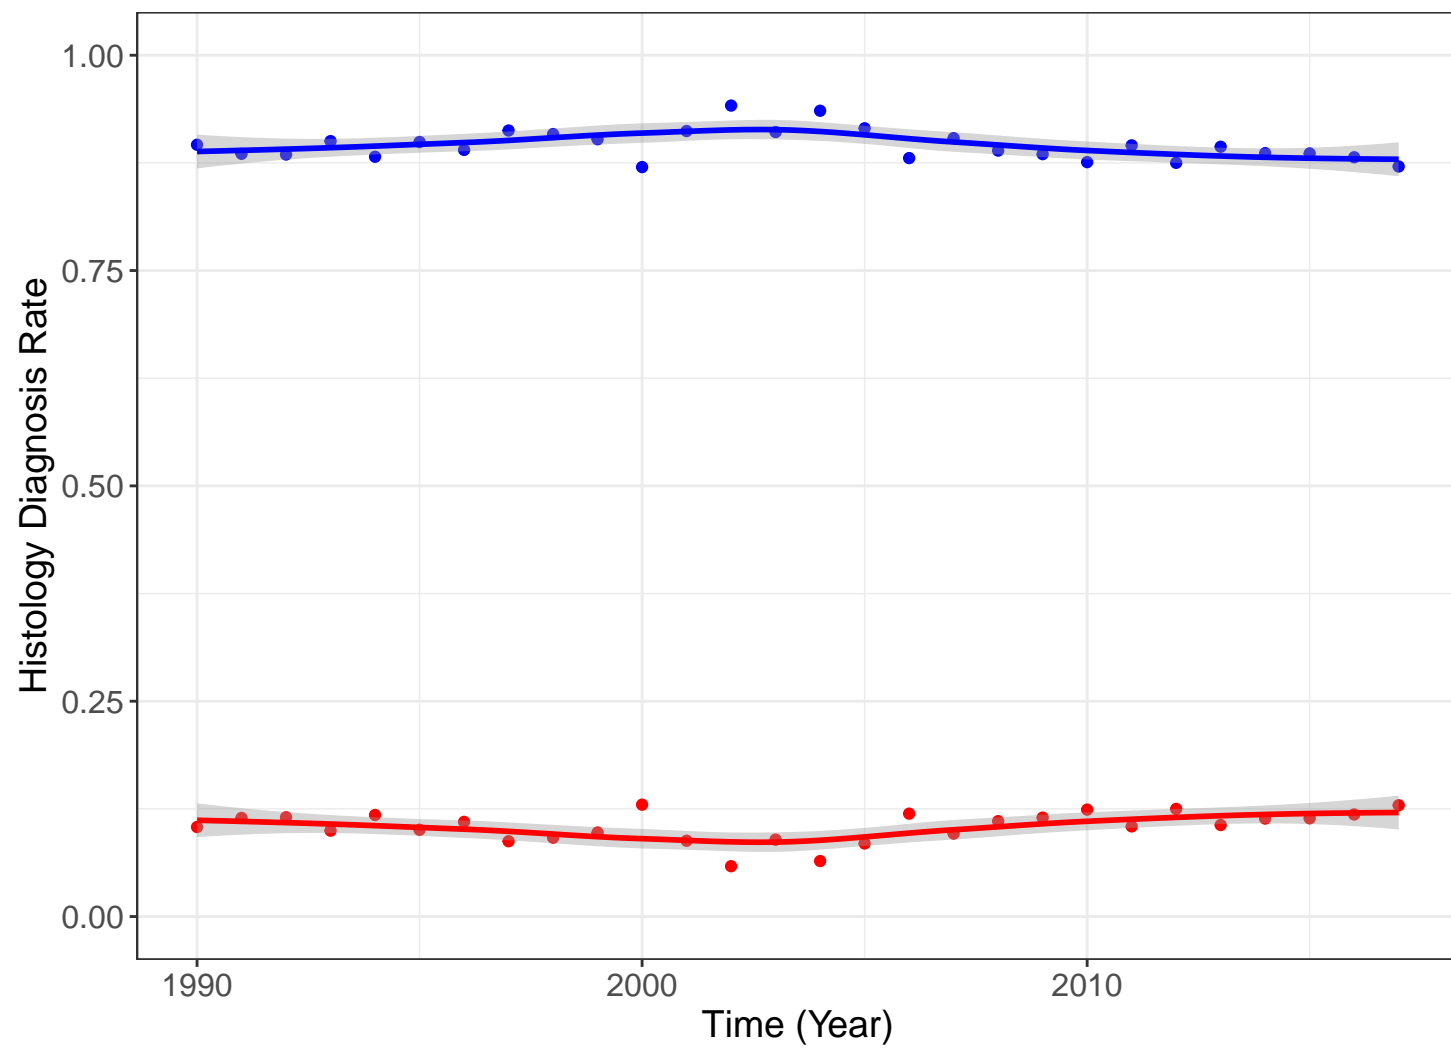

**B**

Trend of Mean Size for Each Year in Entire Cohort

Histology — IDC — ILC

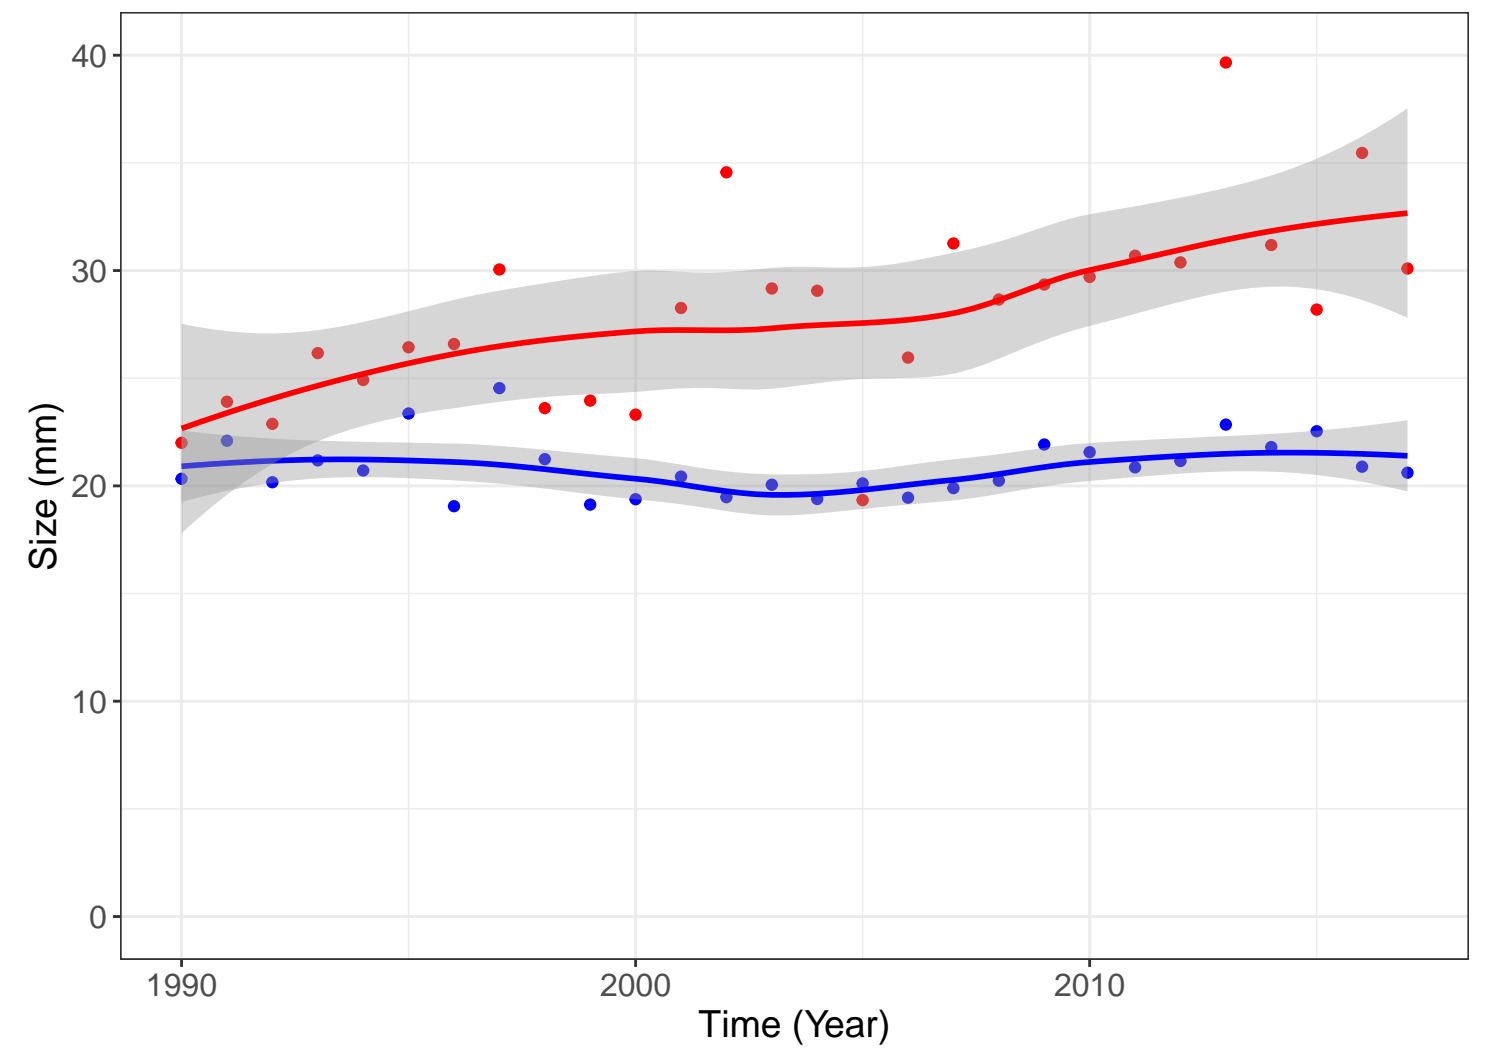

**C**

Trend of Surgery Frequency for IDC/ILC in Entire Cohort

Surgery — Lumpectomy — Mastectomy Histology — IDC — ILC

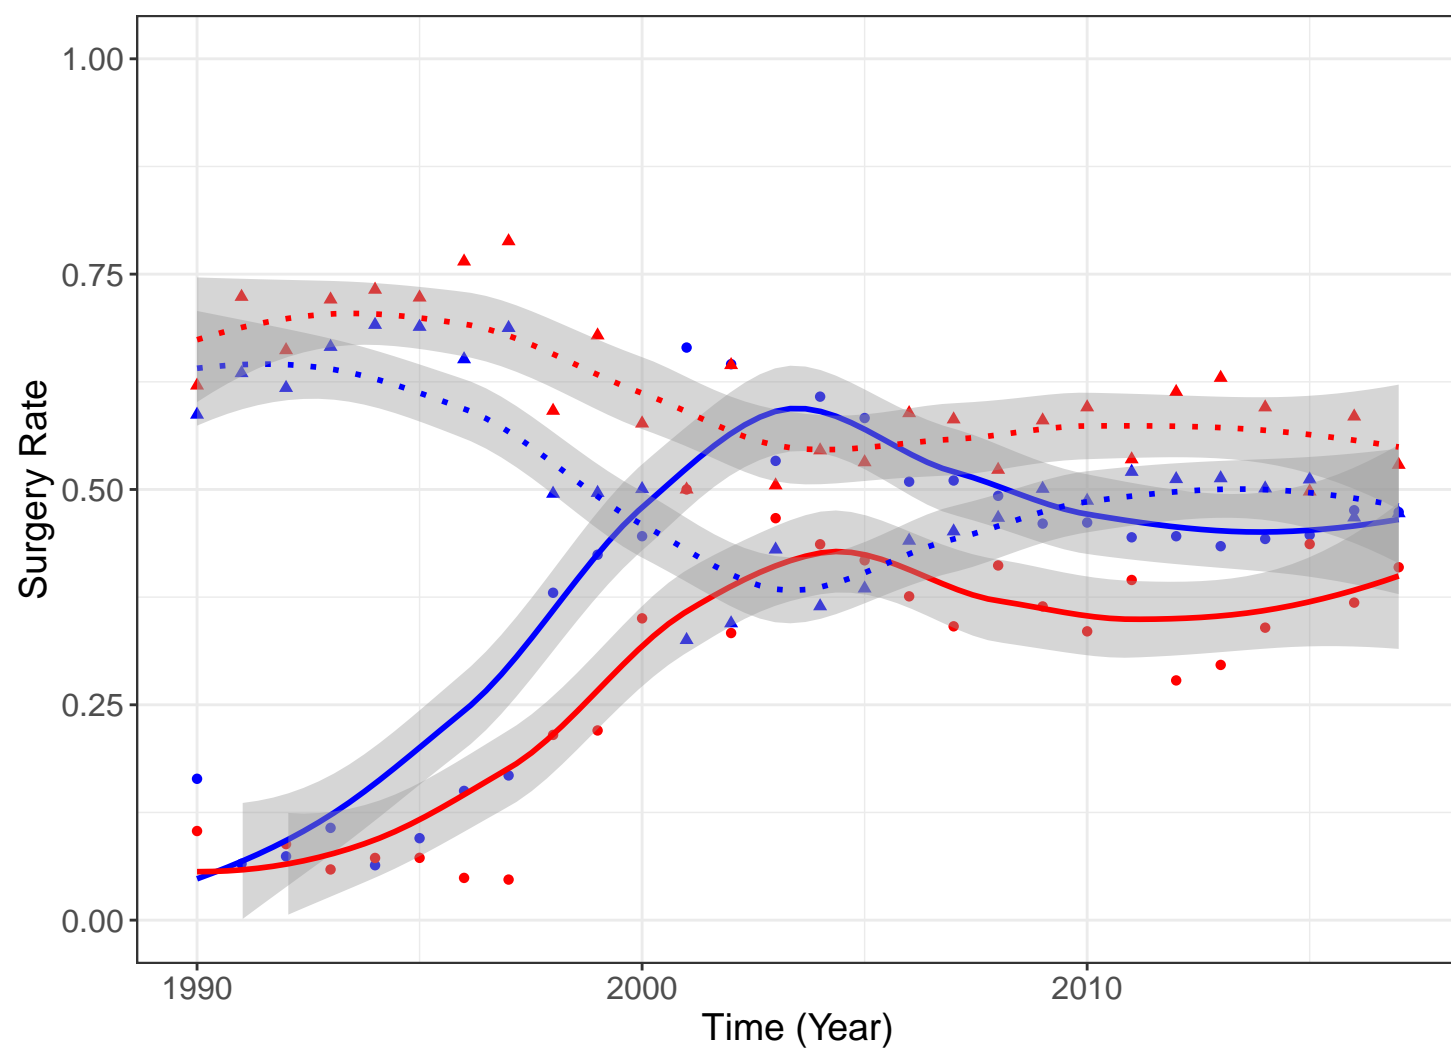

**D**

Trend of Radiation Frequency for IDC/ILC in Entire Cohort

Histology — IDC — ILC

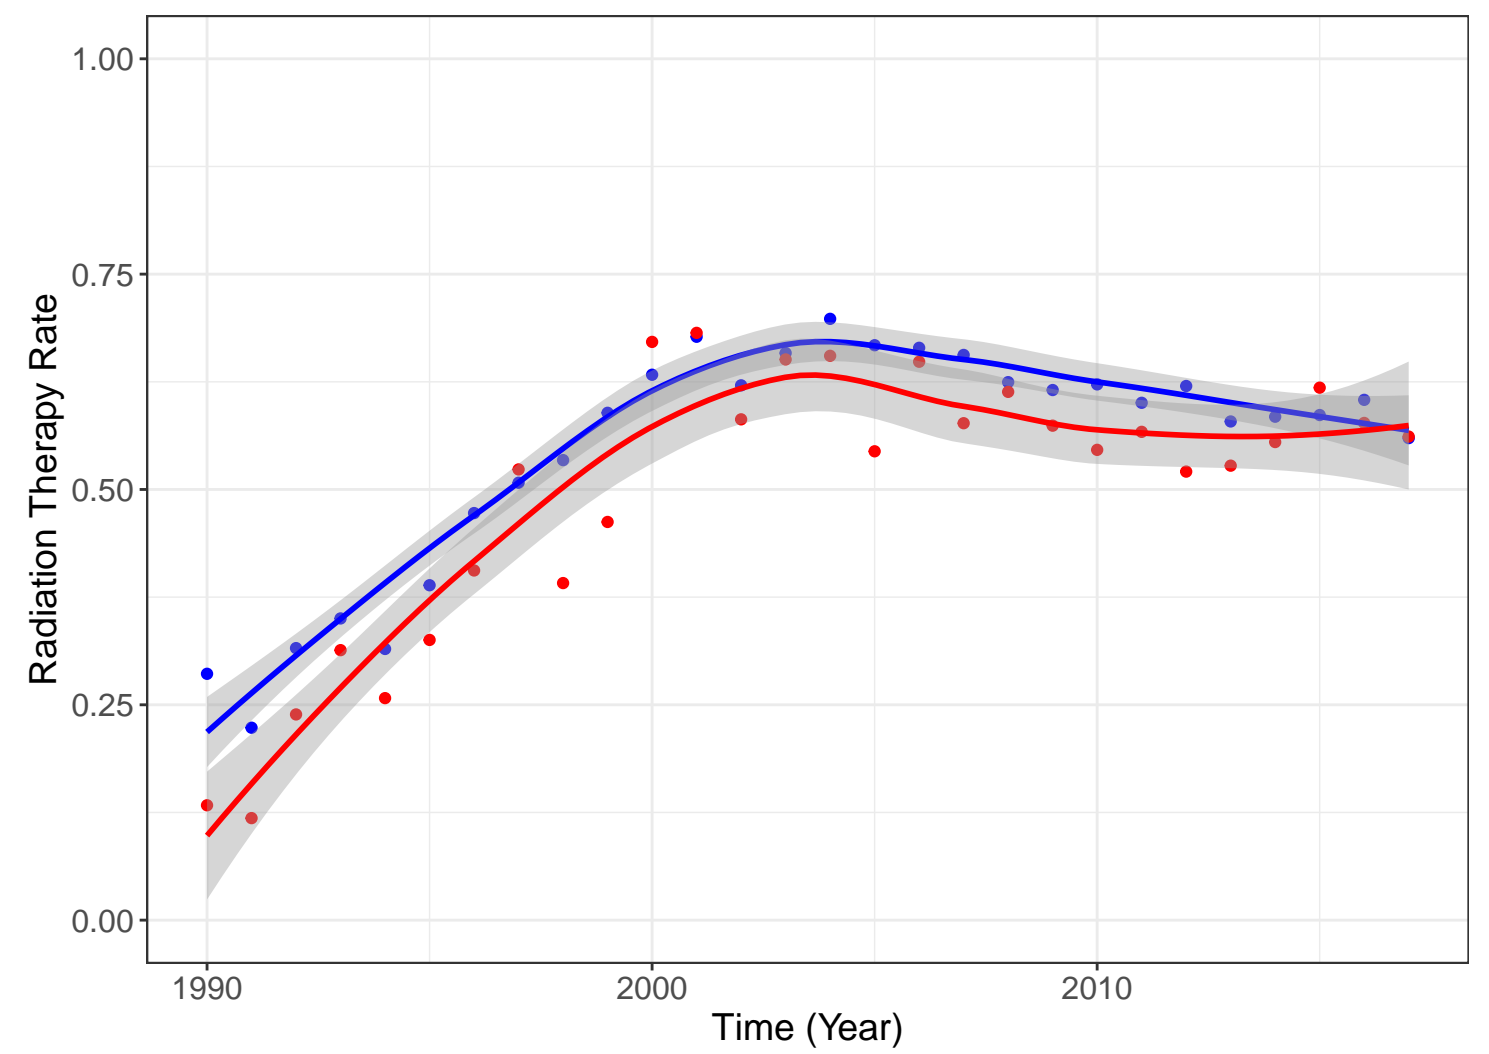

**E**

Trend of Hormone Therapy Frequency for IDC/ILC in Entire Cohort

Histology — IDC — ILC

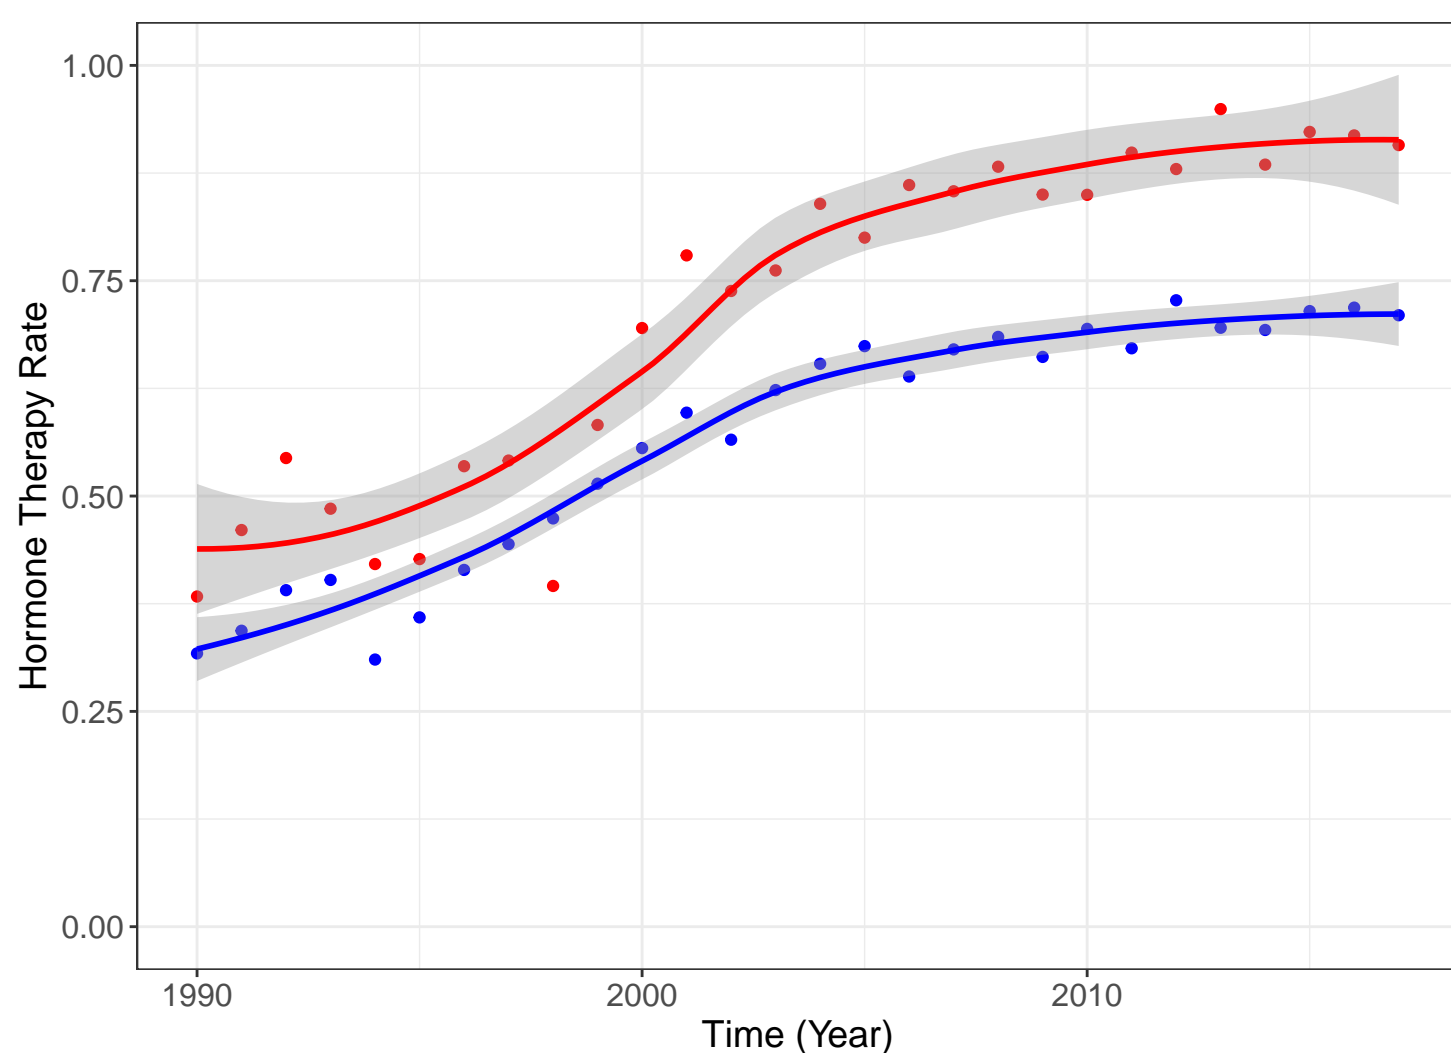

**F**

Trend of Chemotherapy Frequency for IDC/ILC in Entire Cohort

Histology — IDC — ILC

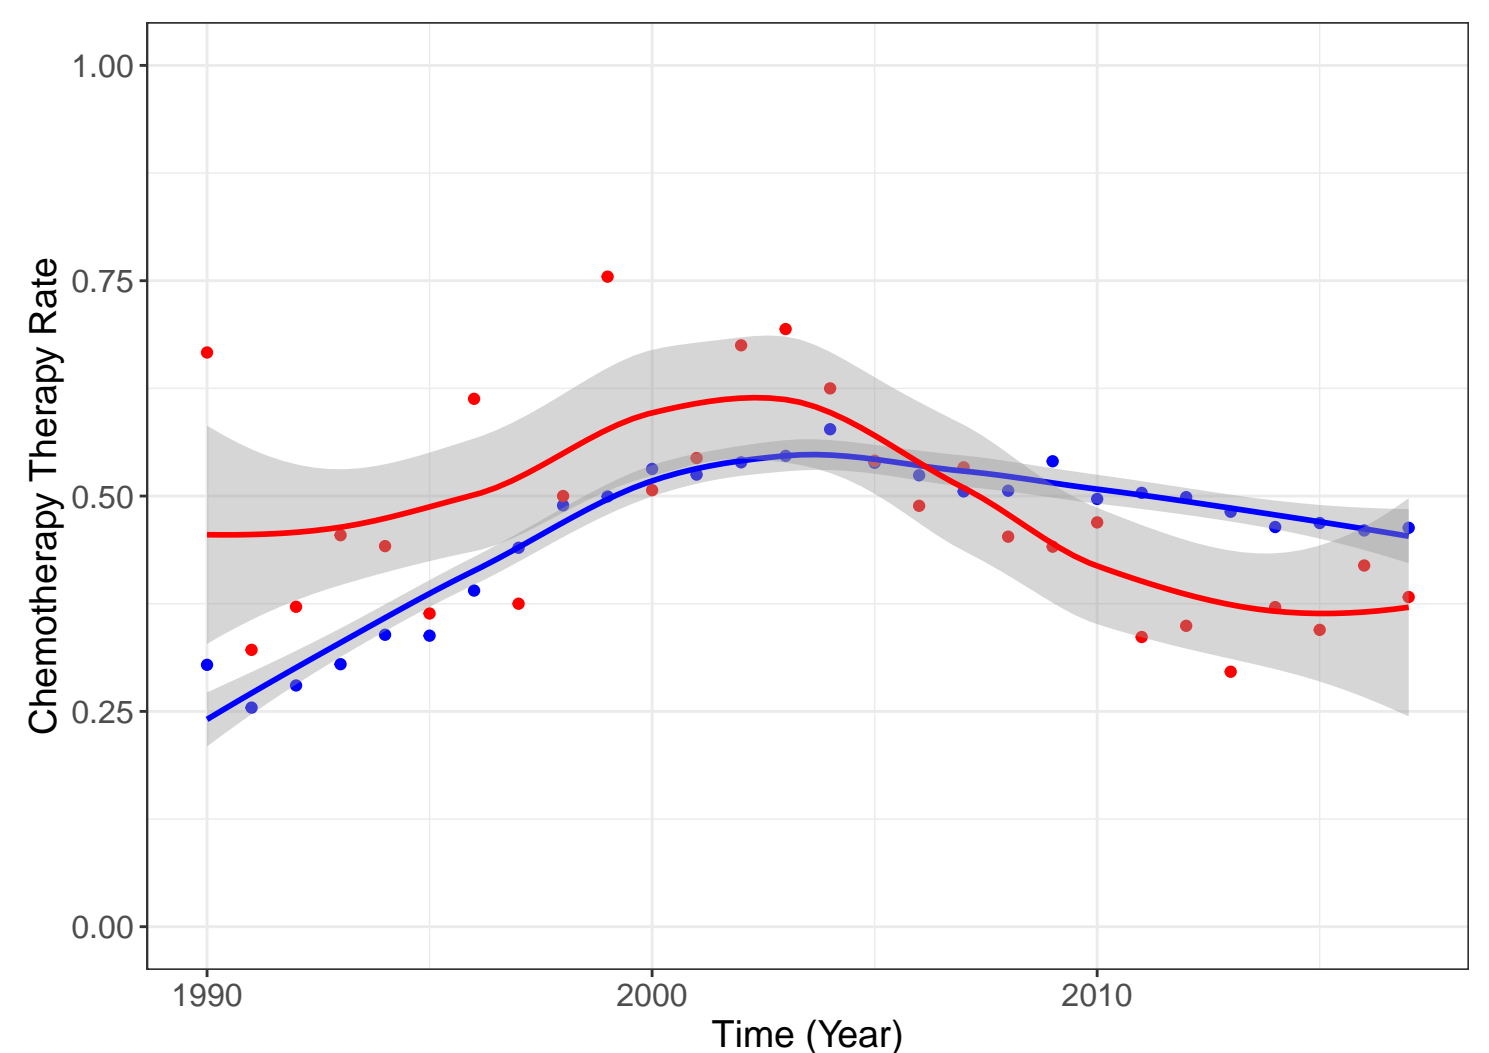

**Supplementary Figure 6: Figure summarizing the key findings of the study.**

**Great Lakes Breast Cancer Consortium**

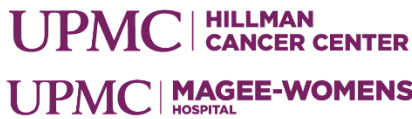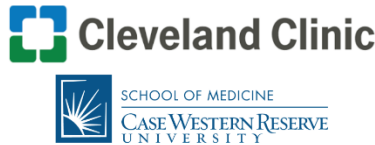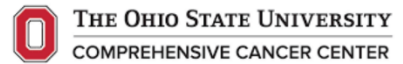

**Participants**

UPMC CCF OSUCCC

**33,662 patients** with breast cancer in the study from three institutions, including **3,617 patients** with **invasive lobular cancer (ILC)**

Largest study to date of patients with ILC with comprehensive clinical and outcomes data from limited centers

**Study Design & Key Findings**

IDC

ILC

**Study Design:** retrospective cohort study employing propensity score matching to evaluate differences between IDC and ILC.

---

Patients with ILC have larger tumors diagnosed at higher stages with size at diagnosis increasing over time

Rates of mastectomy use remain high with ILC > IDC

Patients with ILC have more late recurrences than patients with IDC, affecting OS and DFS despite fewer patients being identified as high-risk by molecular profiling

Need for additional research in:  
 -> Imaging  
 -> Cell dormancy  
 -> Predictive markers
